# Supplementary material for: Variations of Nutrient and Antinutrient Components of Bambara Groundnut (Vigna subterranea (L.) Verdc.) Seeds
Source: Hindawi journal article supplement (doi:10.1155/2022/2772362), 2022-10-21
Supplement: f1 [file 2772362.f1.zip]

Archive with 2 entries (2 files):
- Fig. S1.pdf
- Table S1.pdf
