# Supplementary material for: Variations of Nutrient and Antinutrient Components of Bambara Groundnut (Vigna subterranea (L.) Verdc.) Seeds
Source: Hindawi journal article supplement (doi:10.1155/2022/2772362), 2022-10-21
Supplement: f1 [file 2772362.f1.zip › Fig. S1.pdf]

Figure S1: Nutrient and antinutrient compositions of each accession

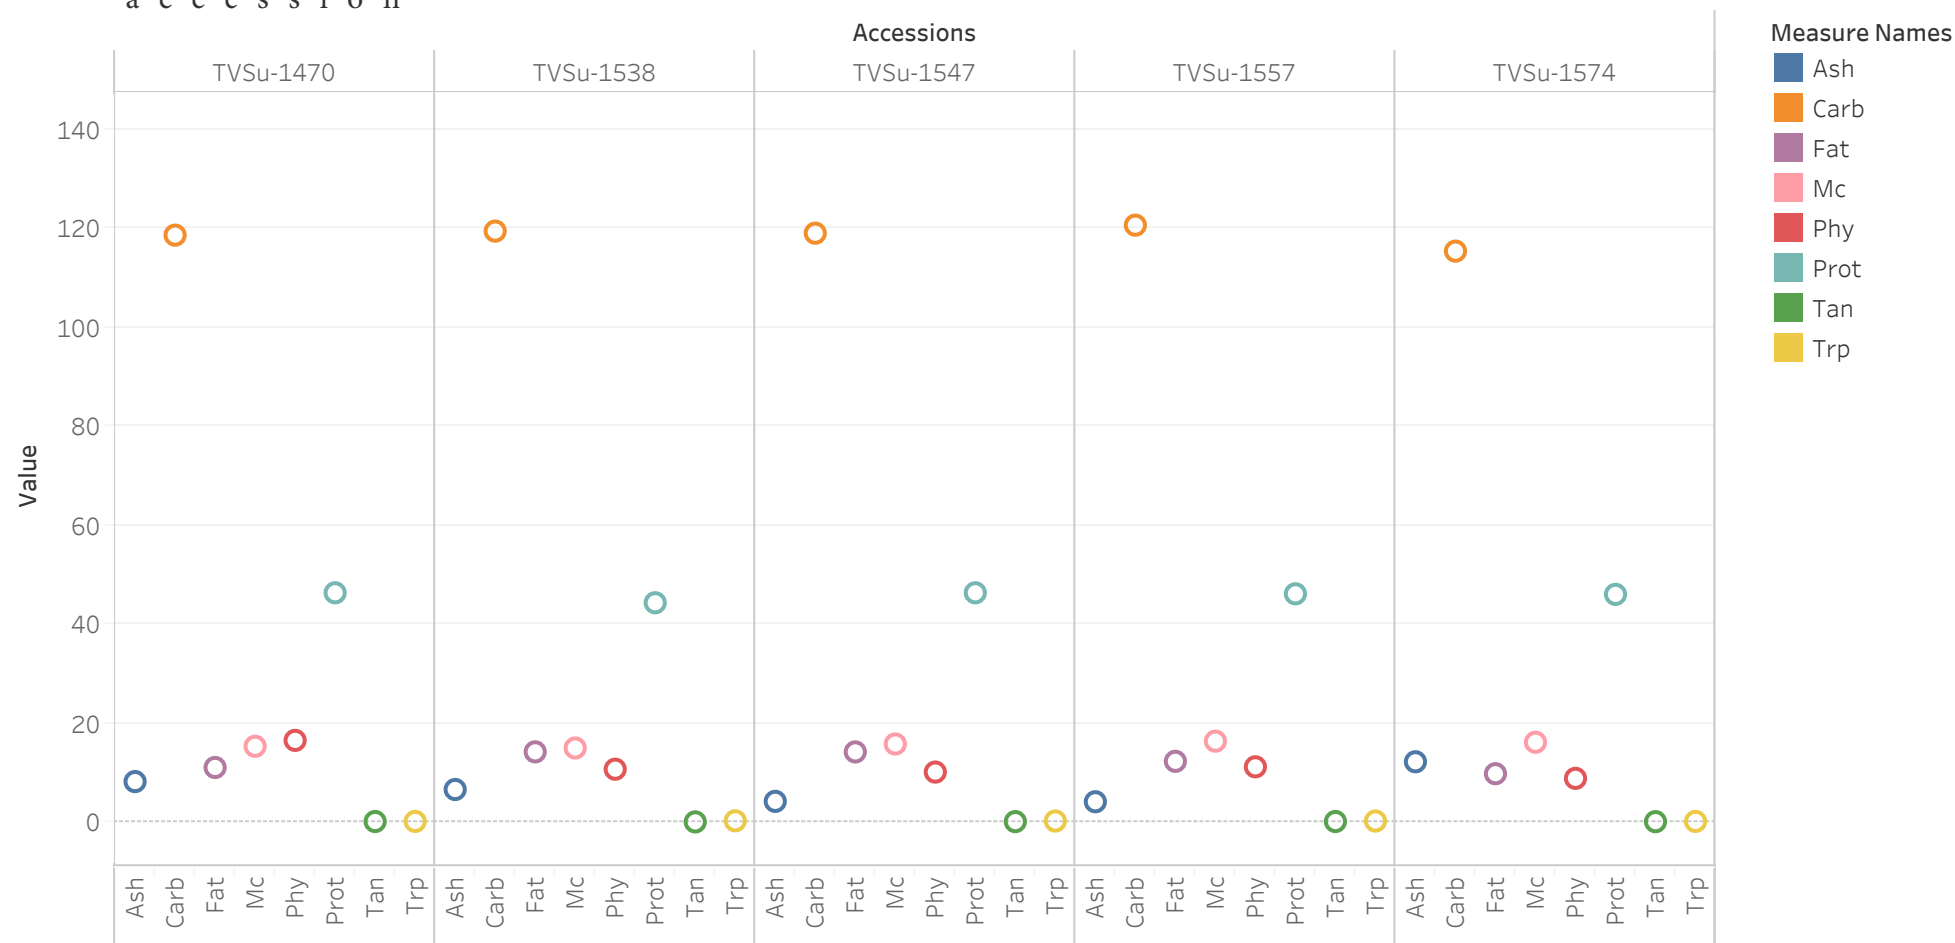

Ash, Carb, Fat, Mc, Phy, Prot, Tan and Trp for each Accessions. Color shows details about Ash, Carb, Fat, Mc, Phy, Prot, Tan and Trp.

Sheet 1

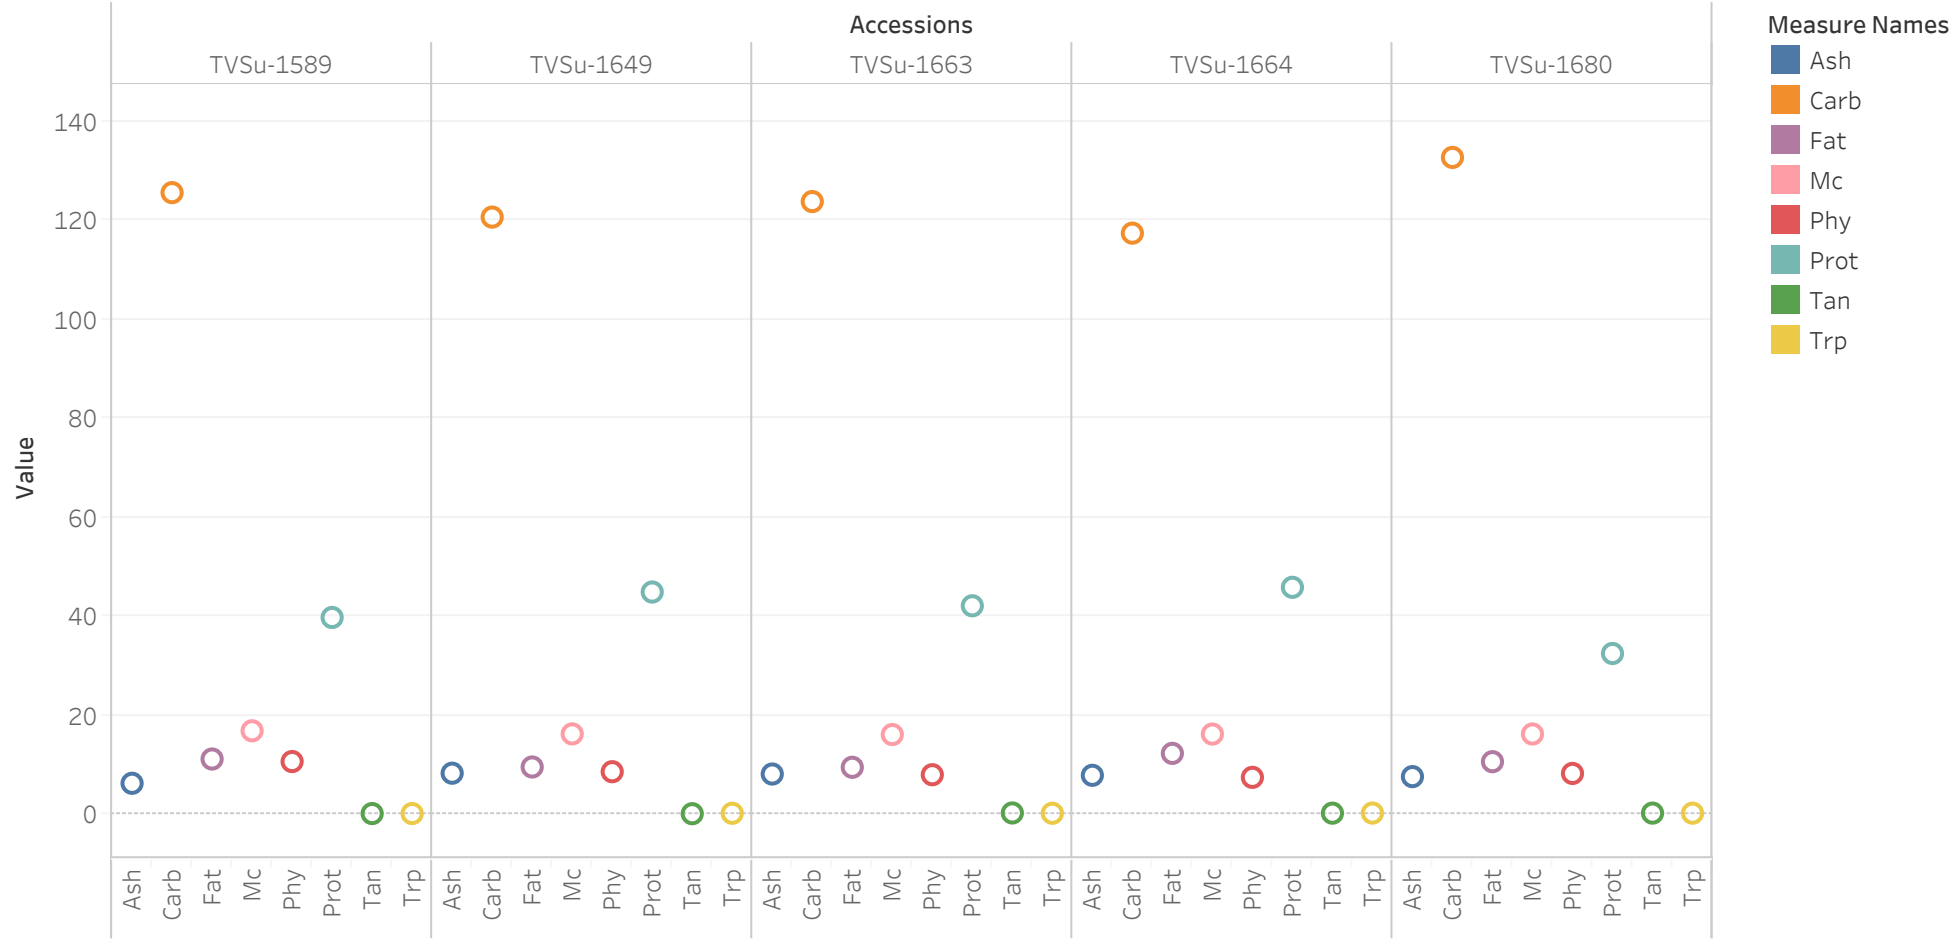

Ash, Carb, Fat, Mc, Phy, Prot, Tan and Trp for each Accessions. Color shows details about Ash, Carb, Fat, Mc, Phy, Prot, Tan and Trp.

Sheet 1

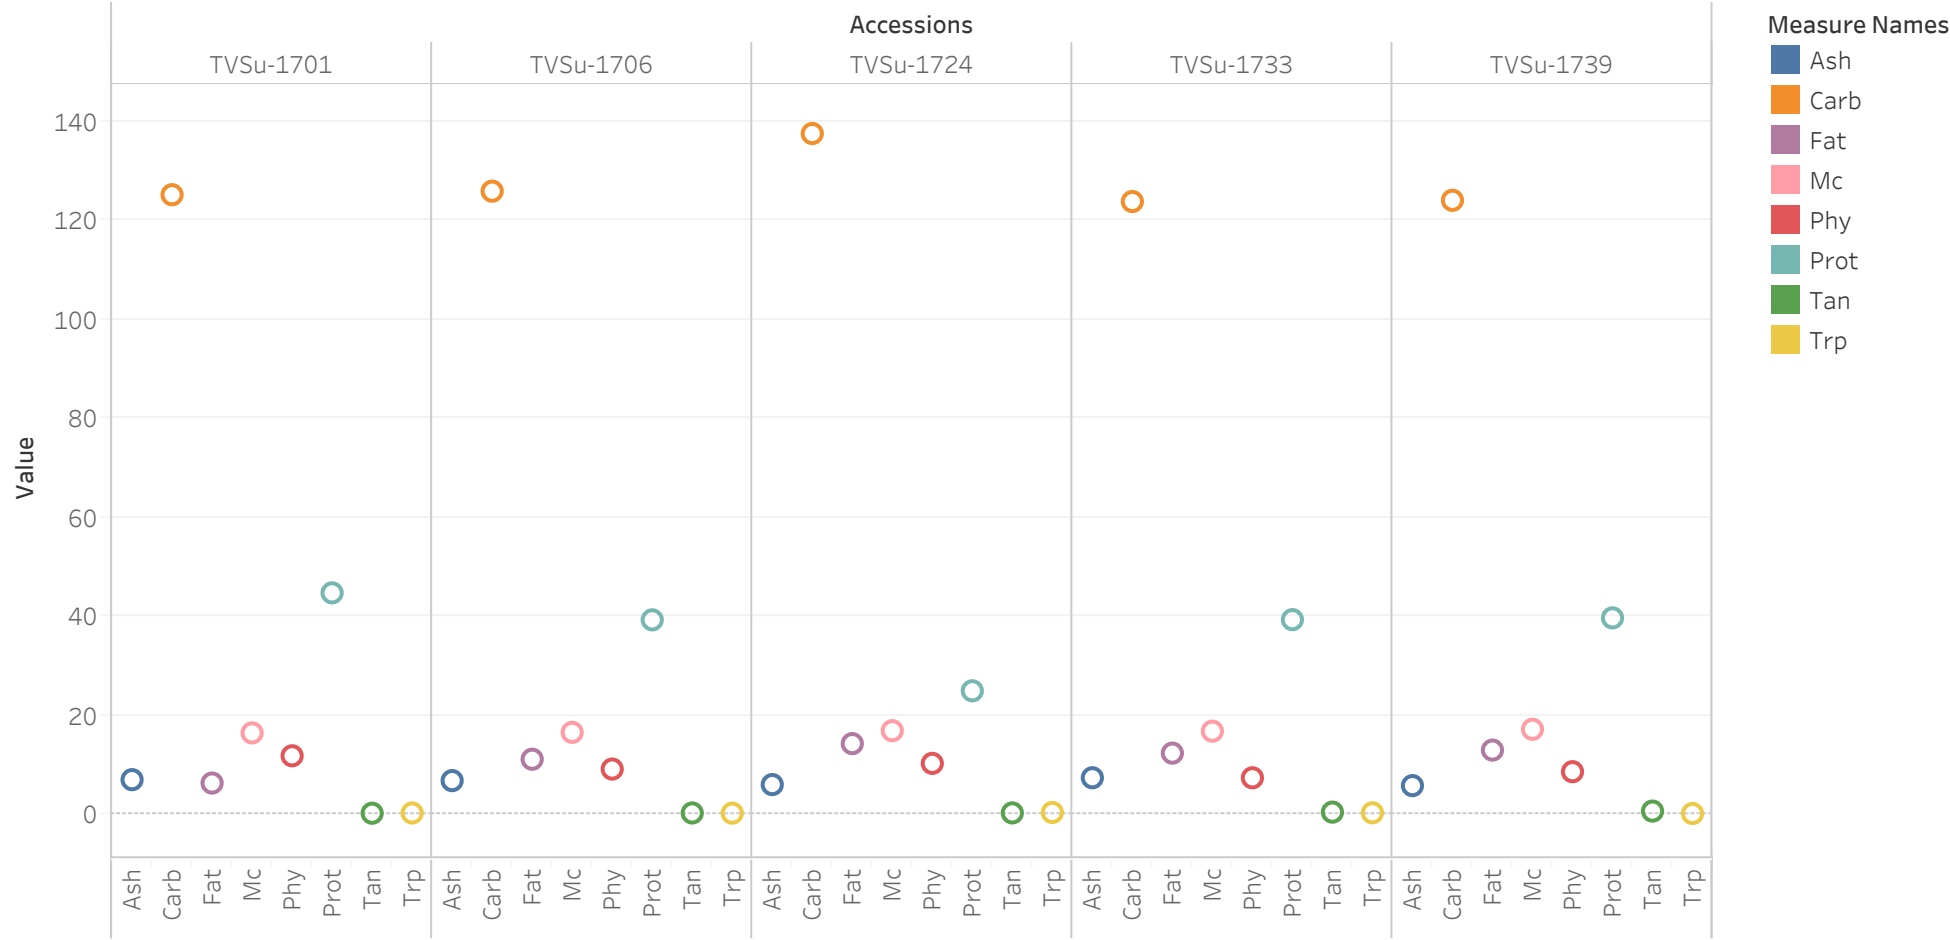

Ash, Carb, Fat, Mc, Phy, Prot, Tan and Trp for each Accessions. Color shows details about Ash, Carb, Fat, Mc, Phy, Prot, Tan and Trp.

Sheet 1

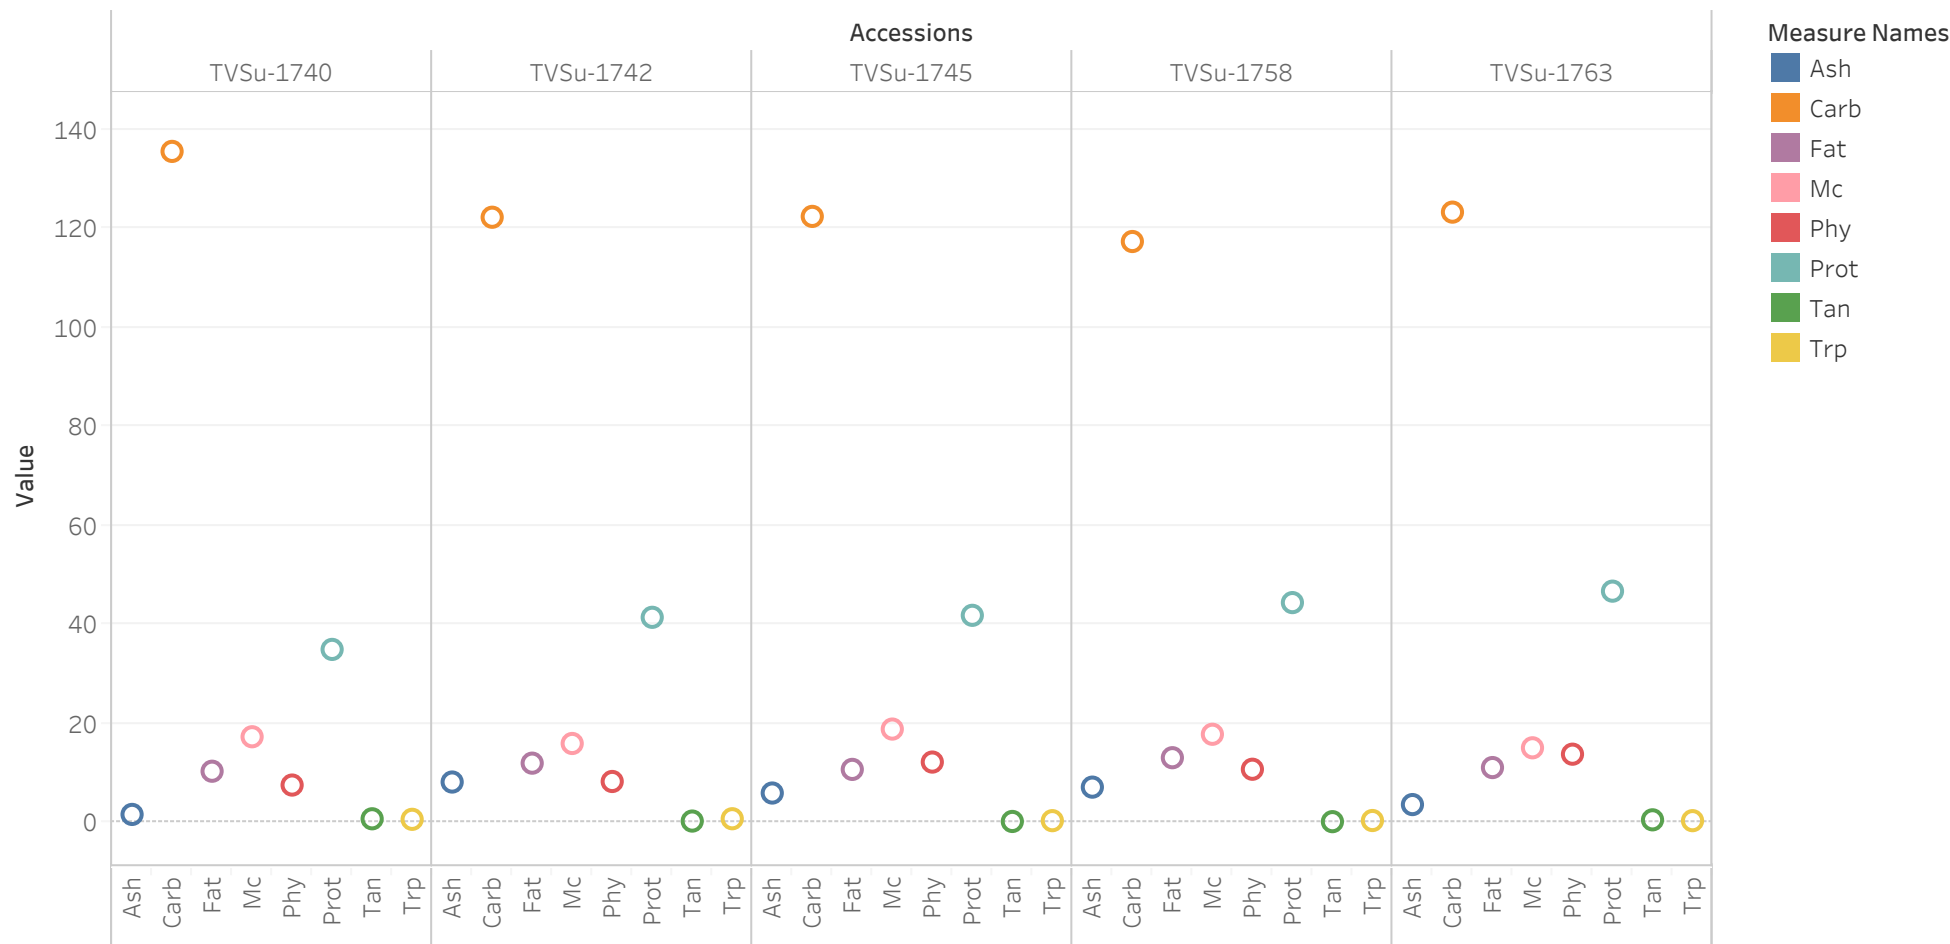

Ash, Carb, Fat, Mc, Phy, Prot, Tan and Trp for each Accessions. Color shows details about Ash, Carb, Fat, Mc, Phy, Prot, Tan and Trp.

Sheet 1

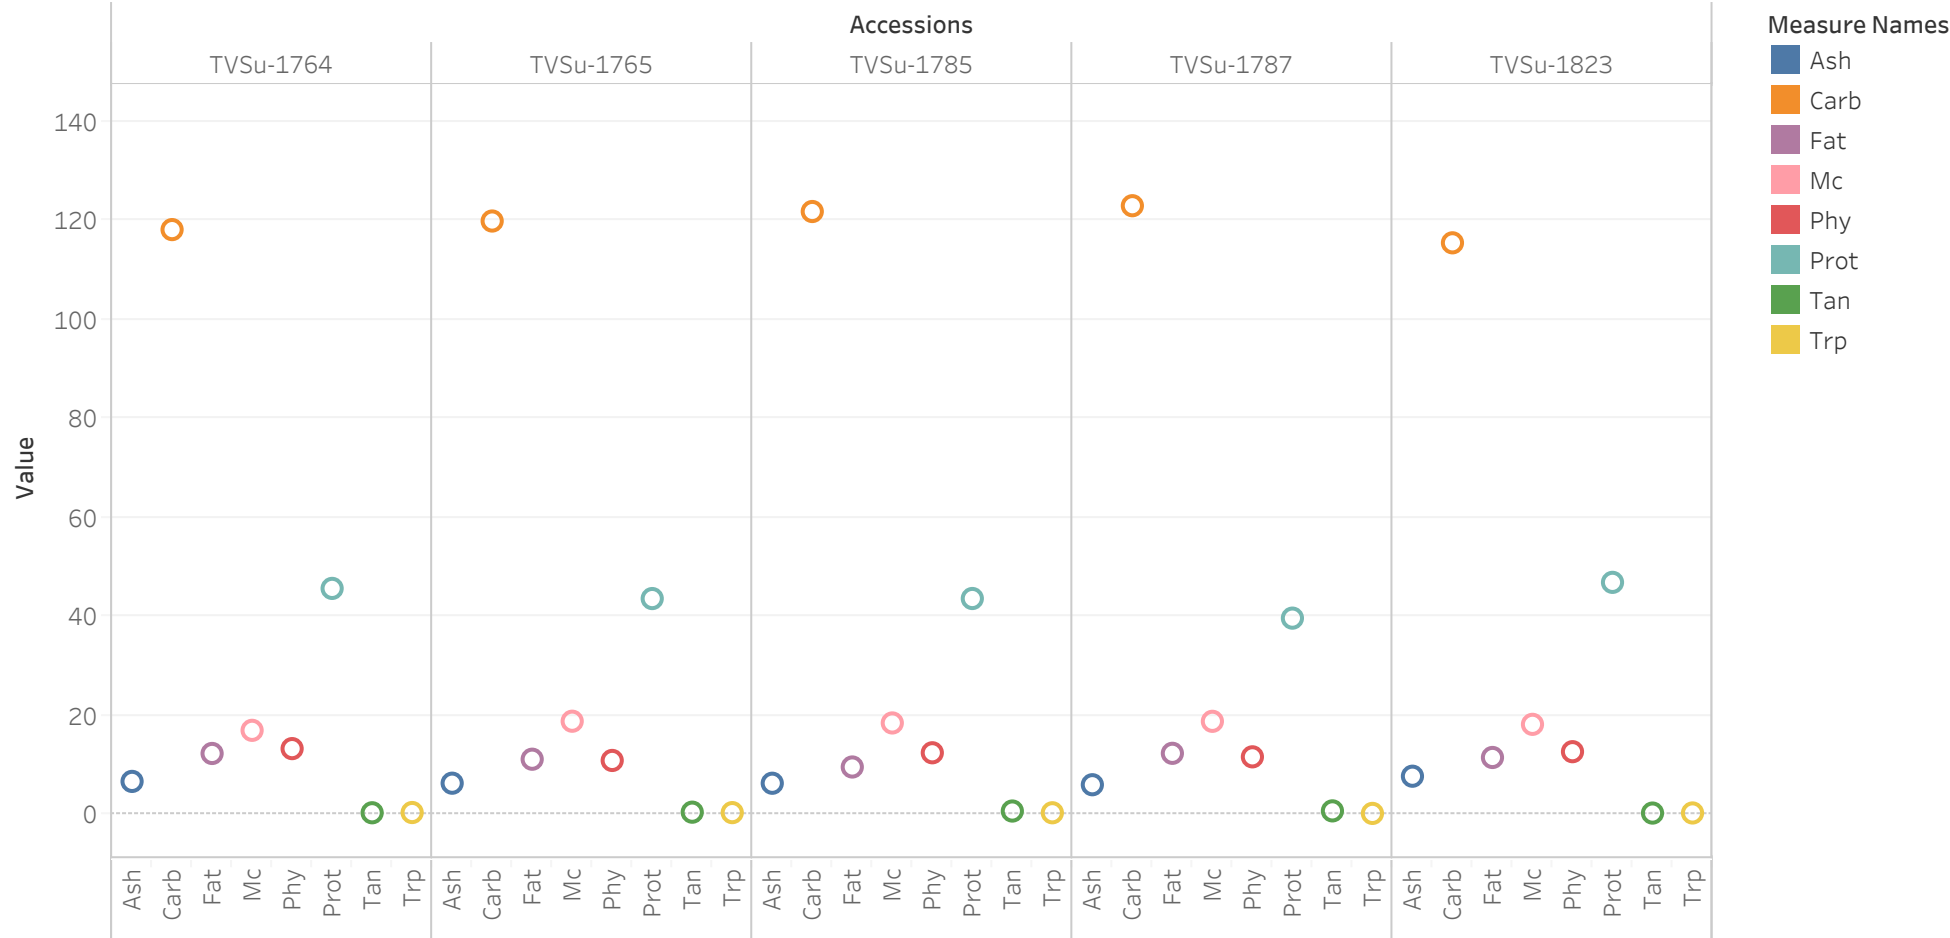

Ash, Carb, Fat, Mc, Phy, Prot, Tan and Trp for each Accessions. Color shows details about Ash, Carb, Fat, Mc, Phy, Prot, Tan and Trp.

Sheet 1

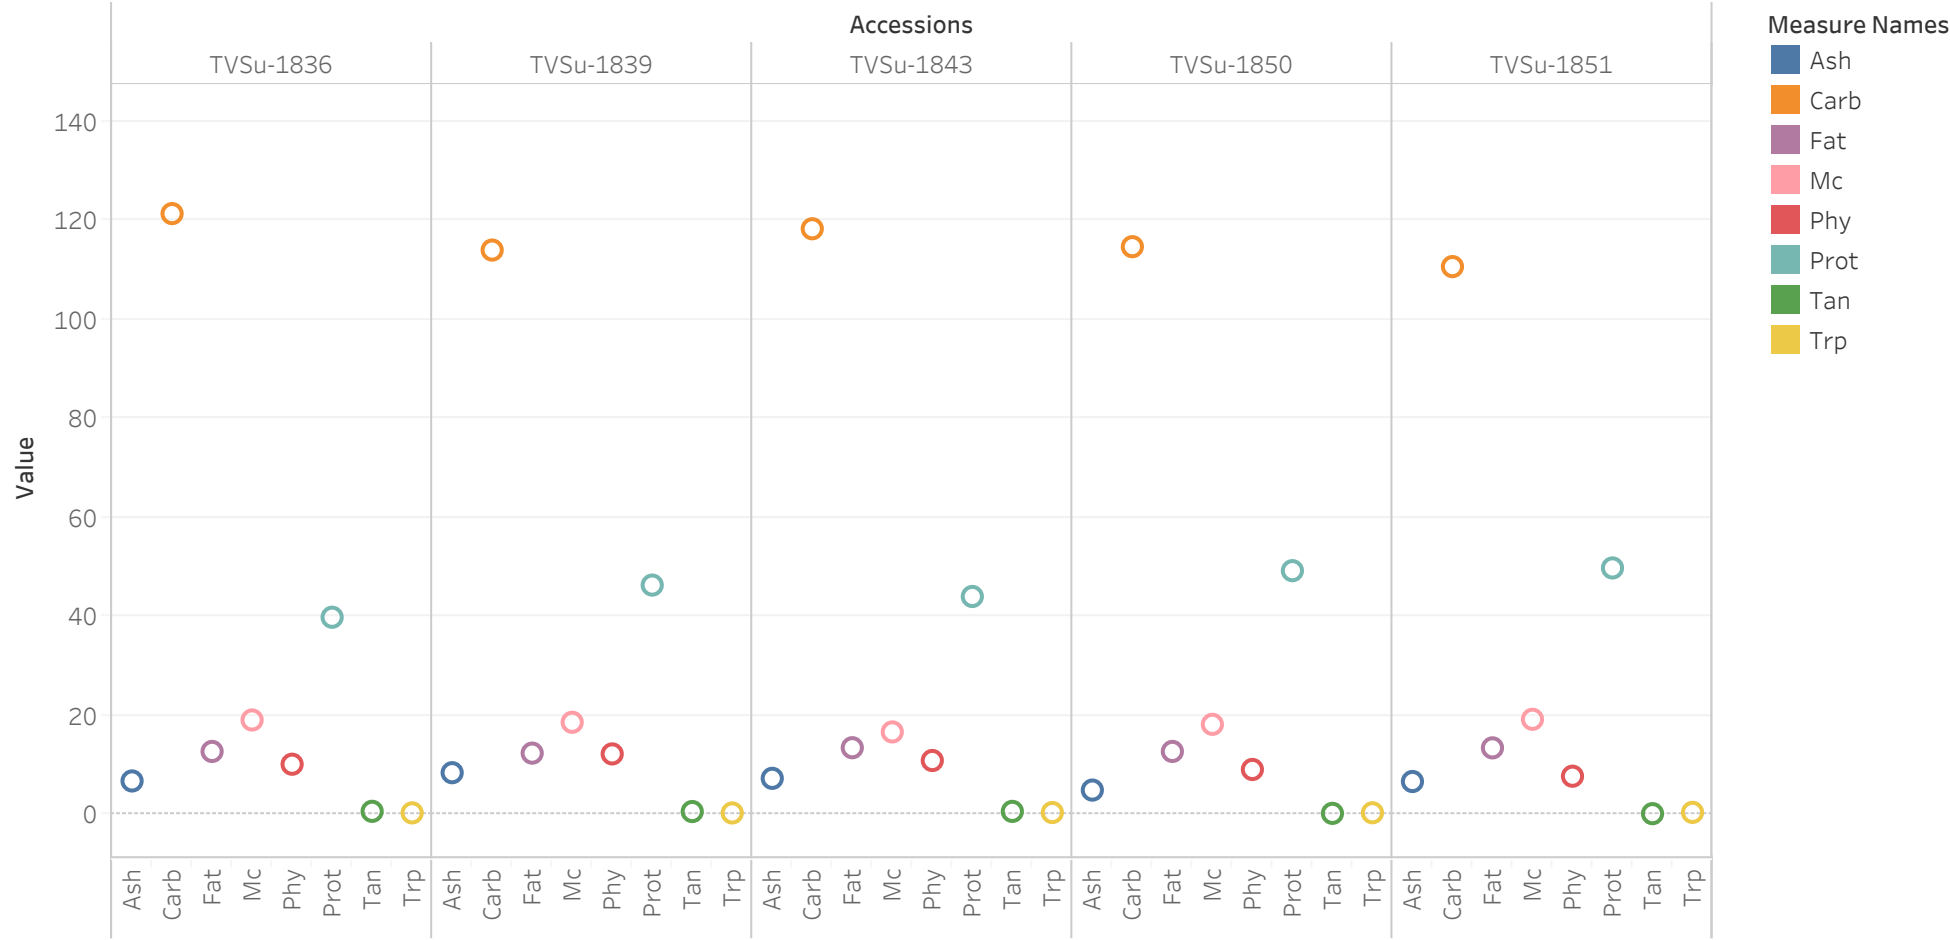

Ash, Carb, Fat, Mc, Phy, Prot, Tan and Trp for each Accessions. Color shows details about Ash, Carb, Fat, Mc, Phy, Prot, Tan and Trp.

Sheet 1

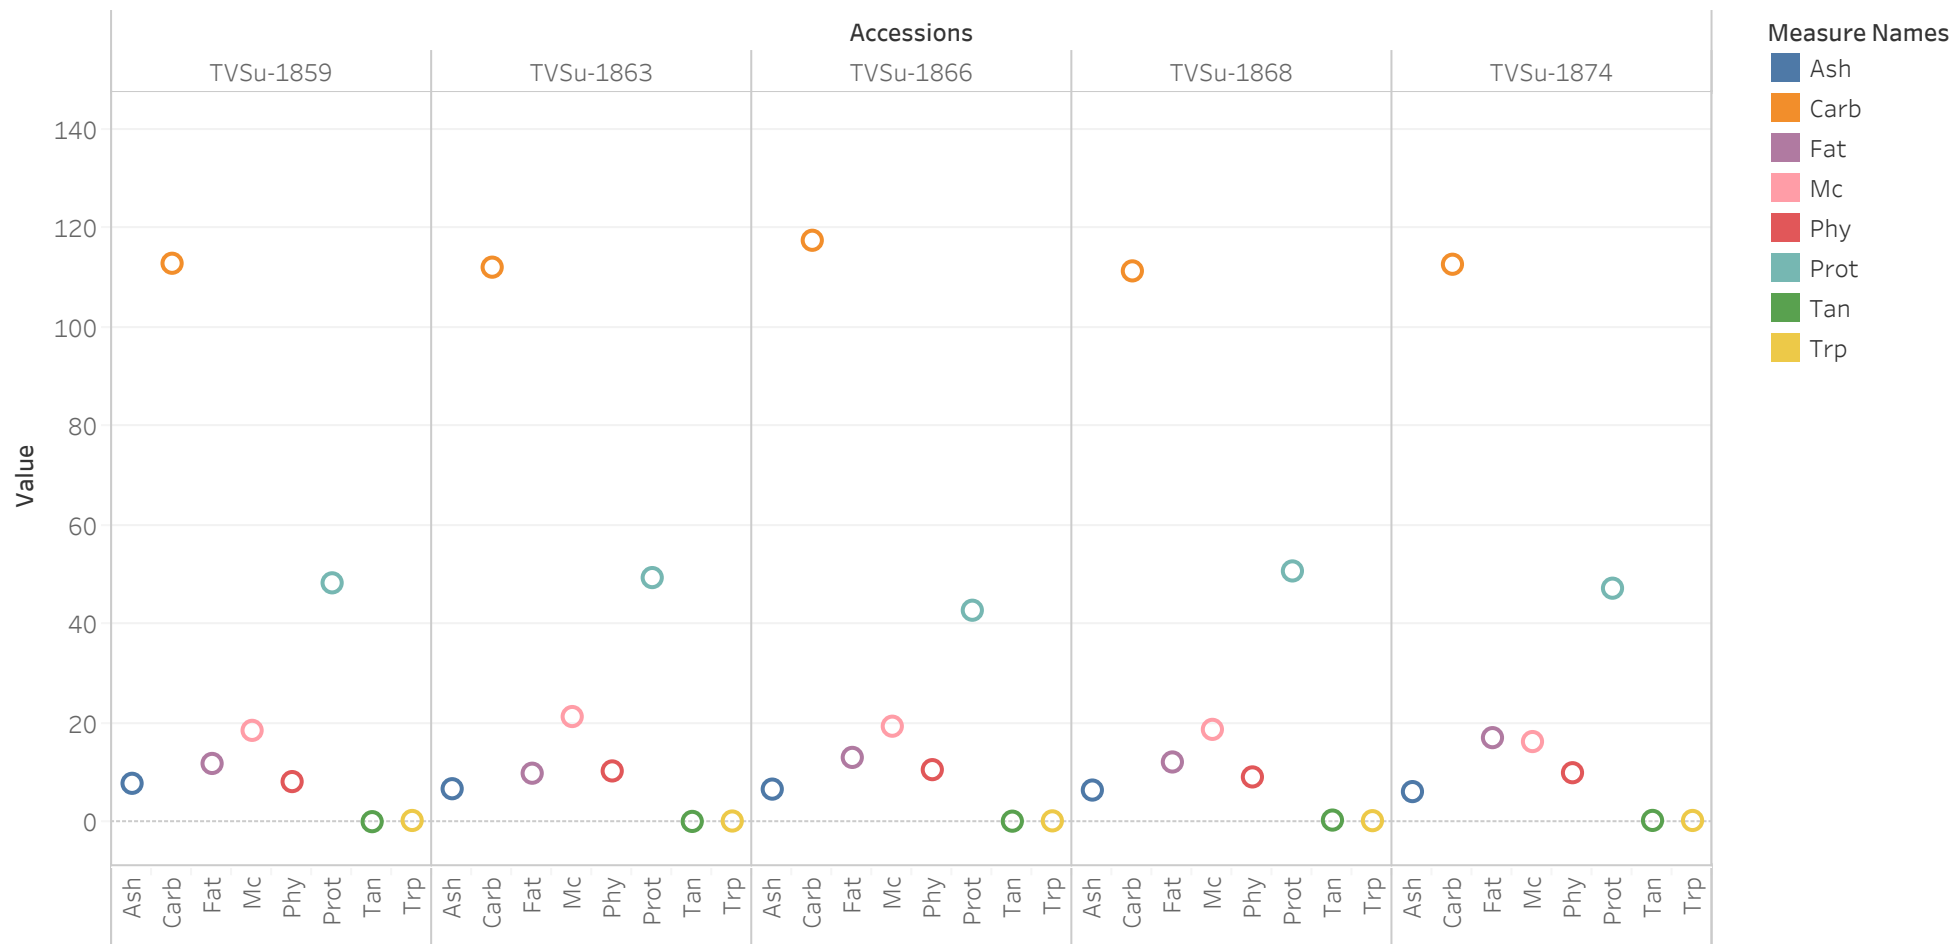

Ash, Carb, Fat, Mc, Phy, Prot, Tan and Trp for each Accessions. Color shows details about Ash, Carb, Fat, Mc, Phy, Prot, Tan and Trp.

Sheet 1

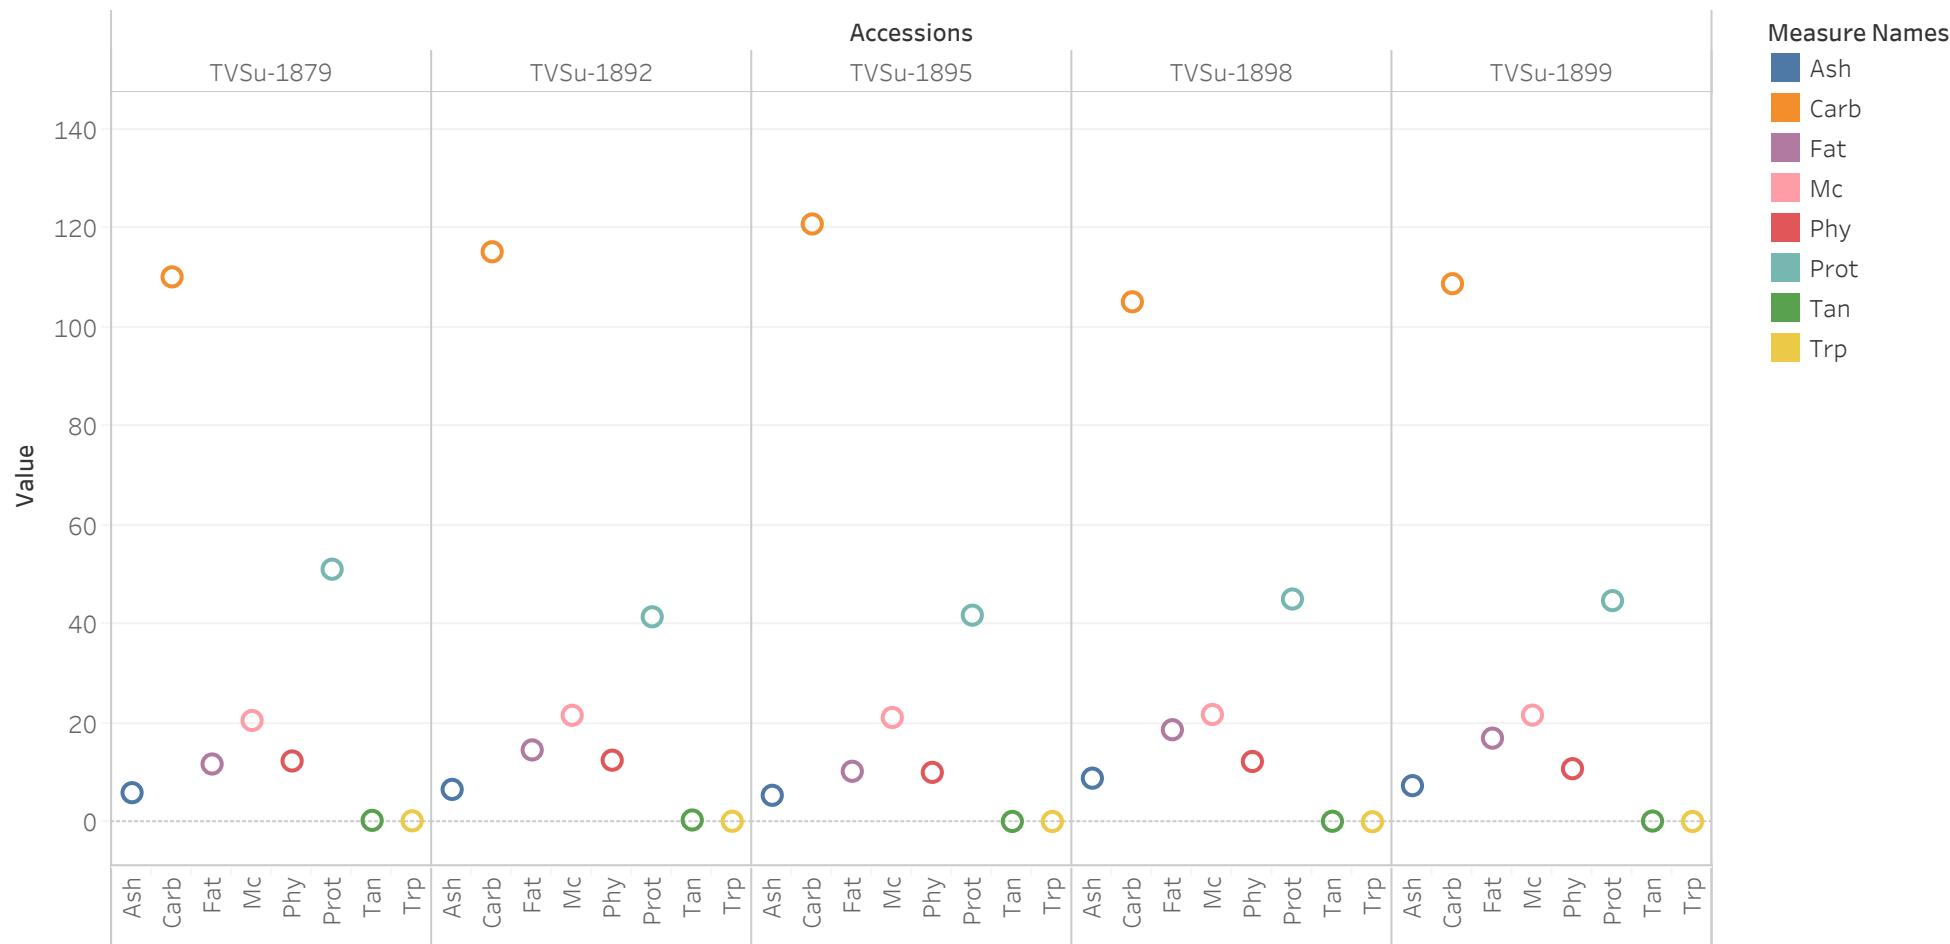

Ash, Carb, Fat, Mc, Phy, Prot, Tan and Trp for each Accessions. Color shows details about Ash, Carb, Fat, Mc, Phy, Prot, Tan and Trp.

Sheet 1

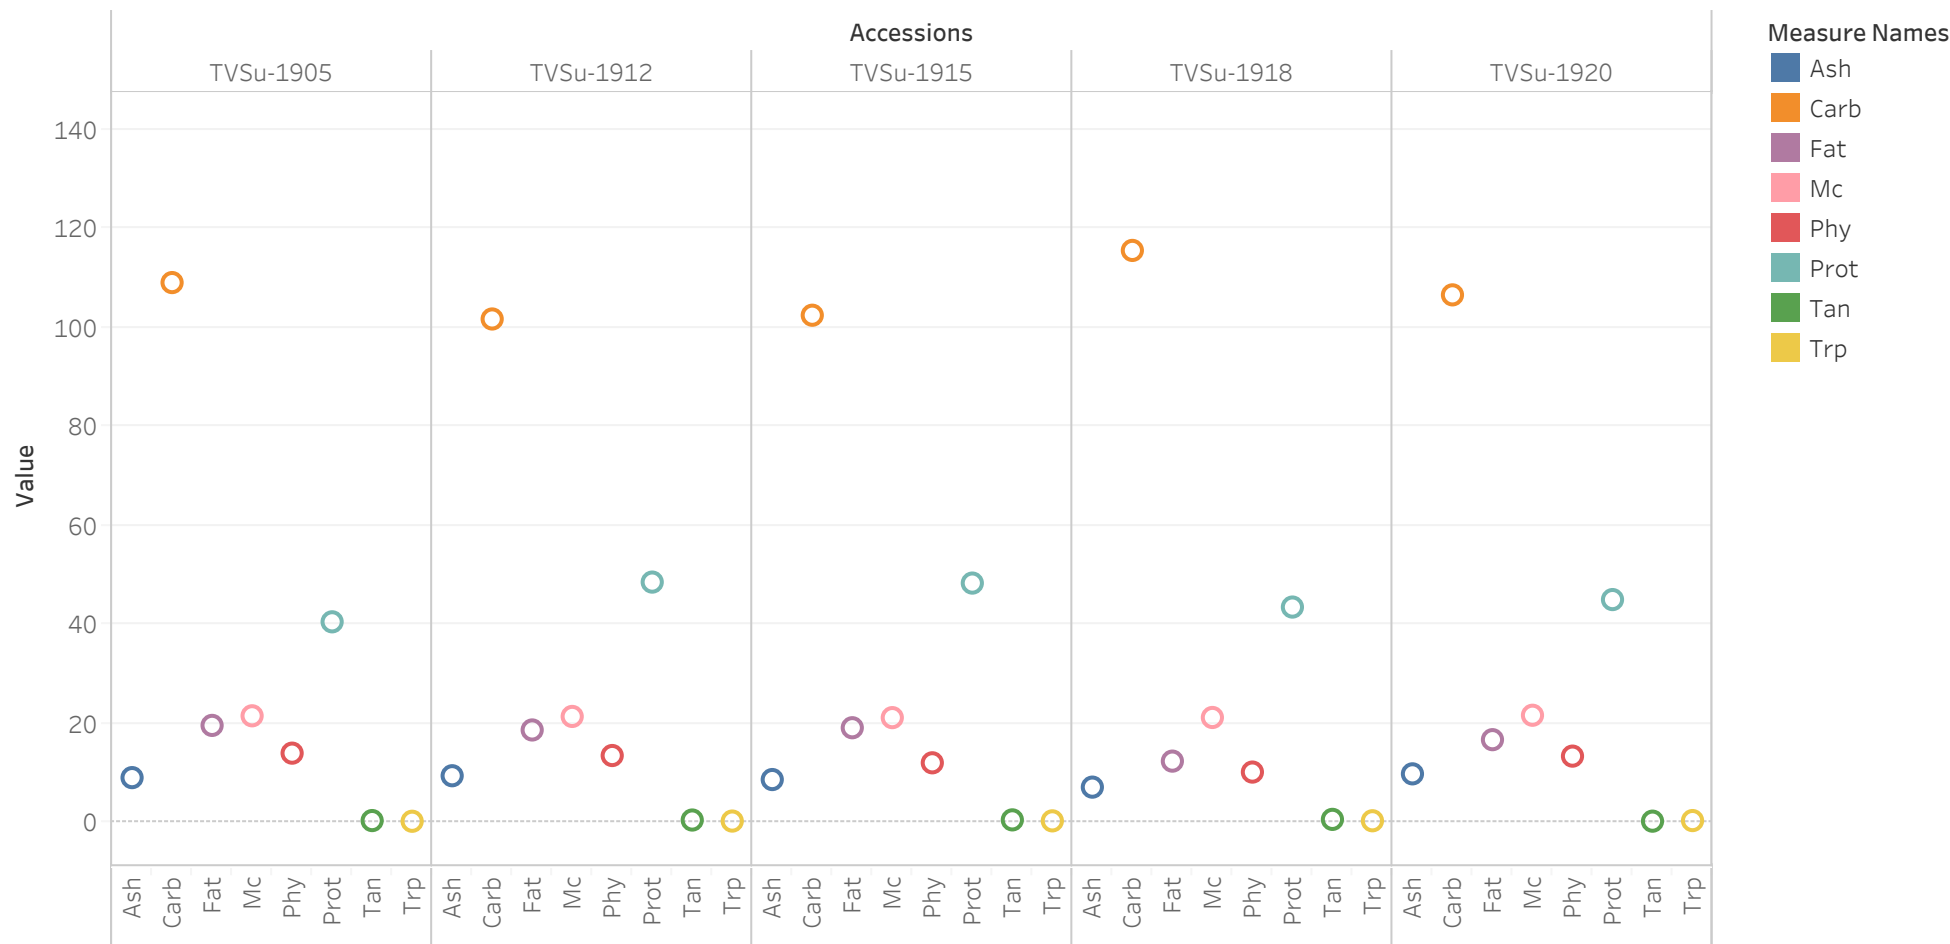

Ash, Carb, Fat, Mc, Phy, Prot, Tan and Trp for each Accessions. Color shows details about Ash, Carb, Fat, Mc, Phy, Prot, Tan and Trp.

Sheet 1

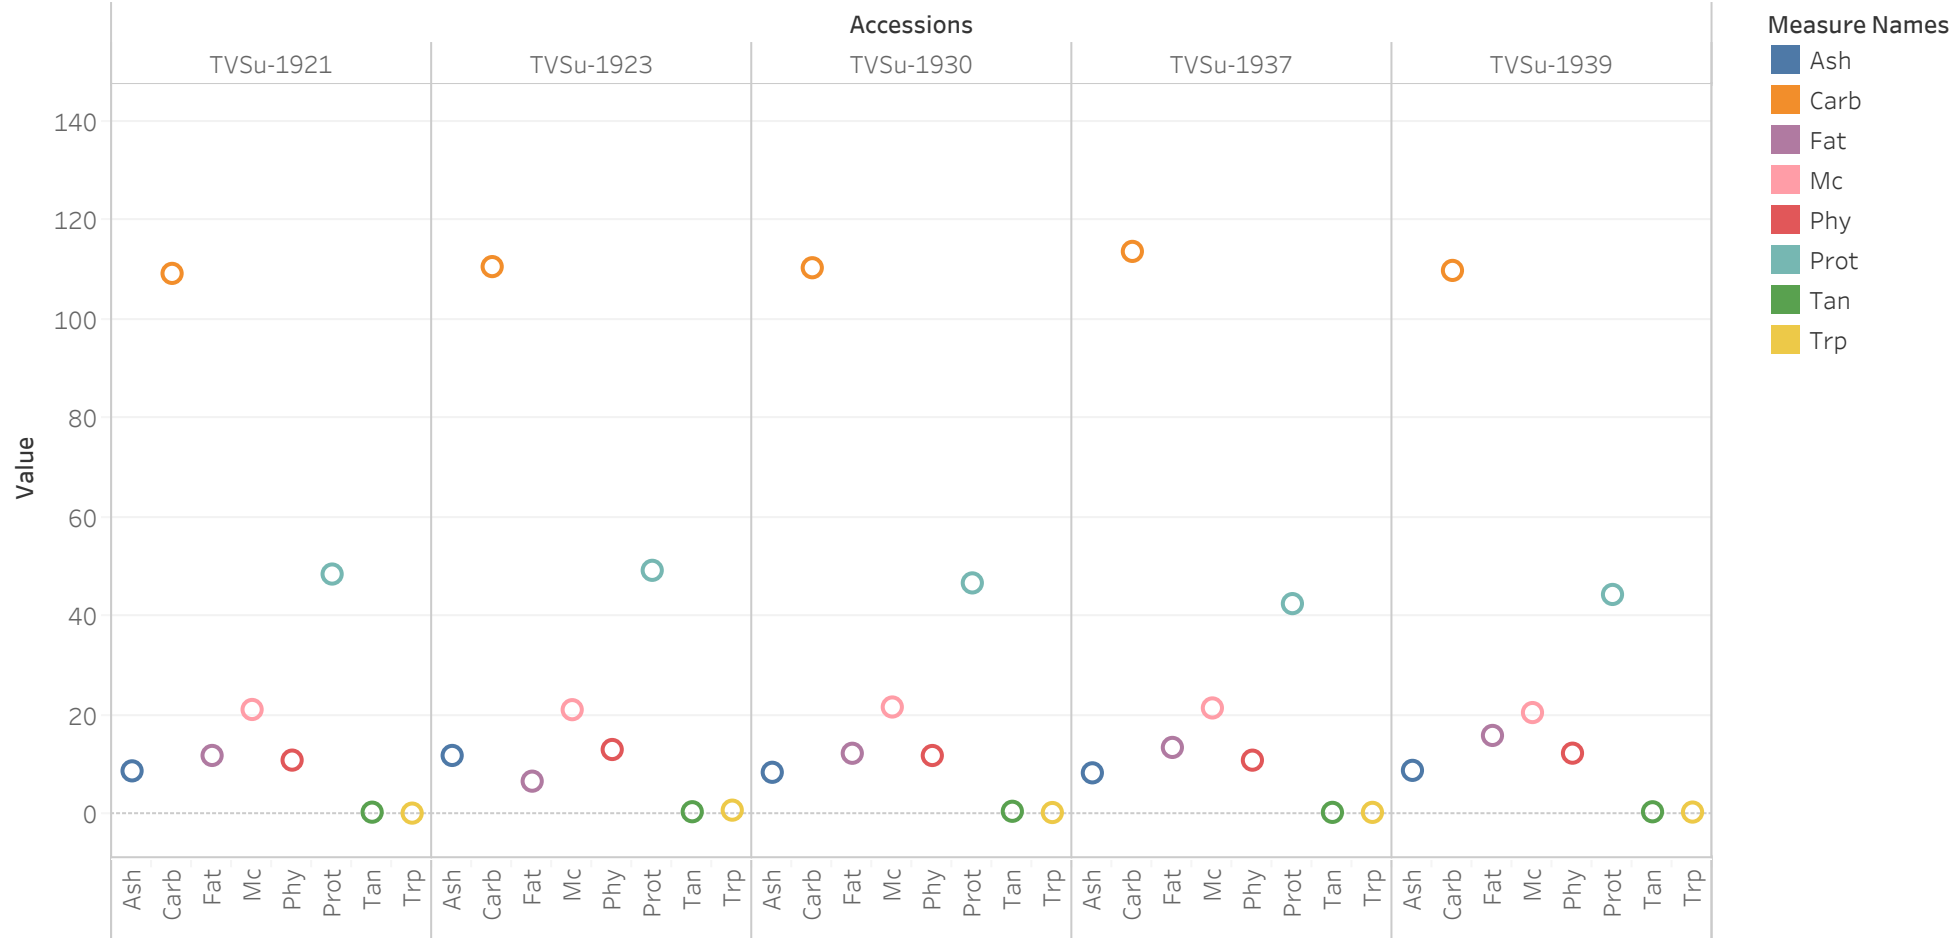

Ash, Carb, Fat, Mc, Phy, Prot, Tan and Trp for each Accessions. Color shows details about Ash, Carb, Fat, Mc, Phy, Prot, Tan and Trp.

Sheet 1

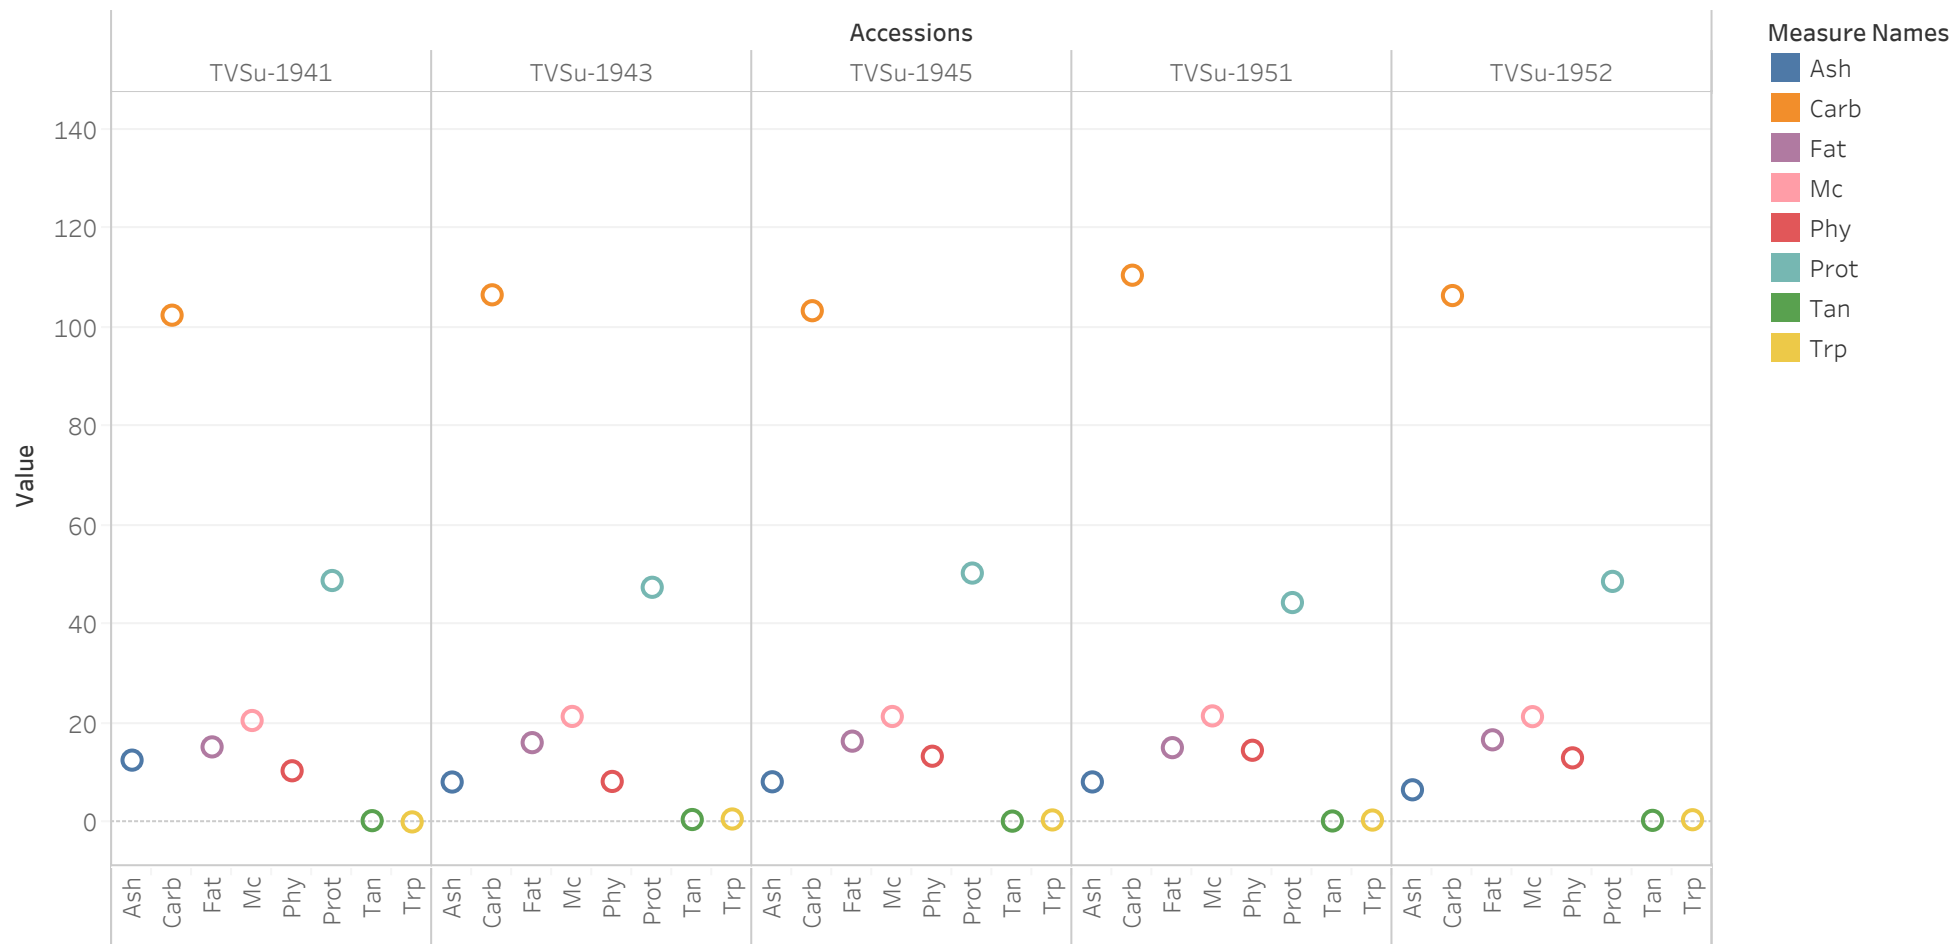

Ash, Carb, Fat, Mc, Phy, Prot, Tan and Trp for each Accessions. Color shows details about Ash, Carb, Fat, Mc, Phy, Prot, Tan and Trp.

Sheet 1

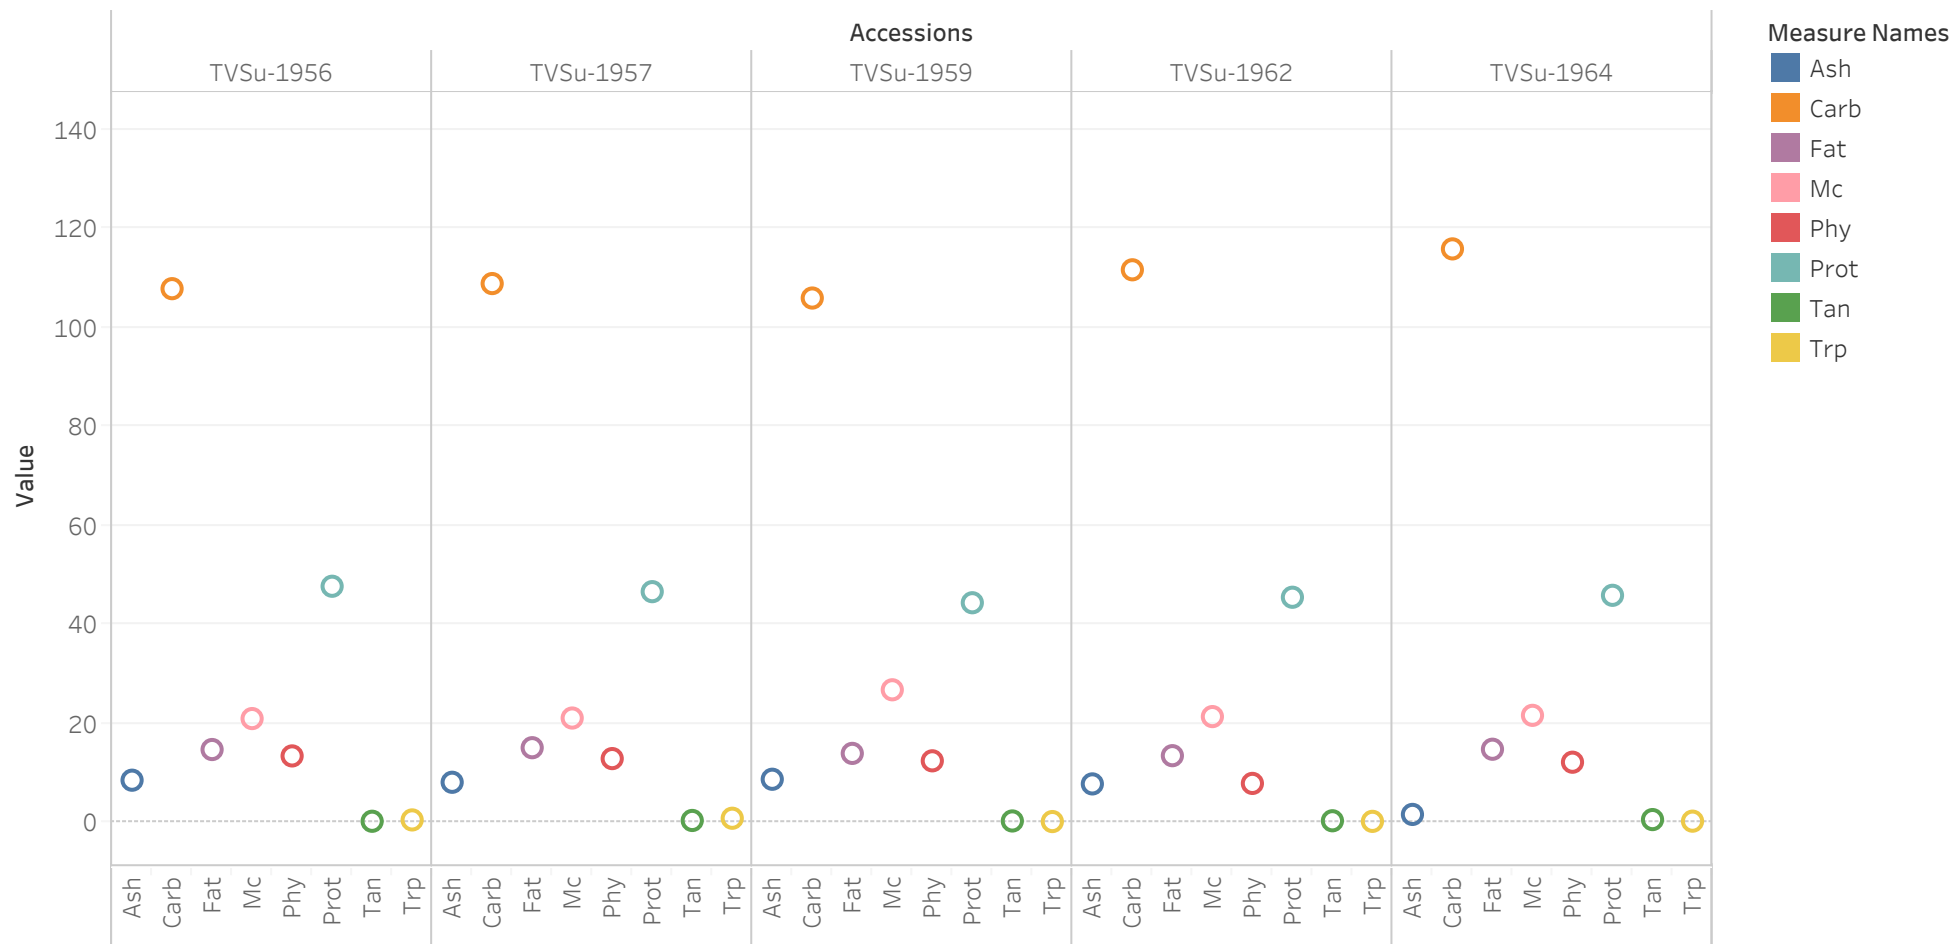

Ash, Carb, Fat, Mc, Phy, Prot, Tan and Trp for each Accessions. Color shows details about Ash, Carb, Fat, Mc, Phy, Prot, Tan and Trp.

Sheet 1

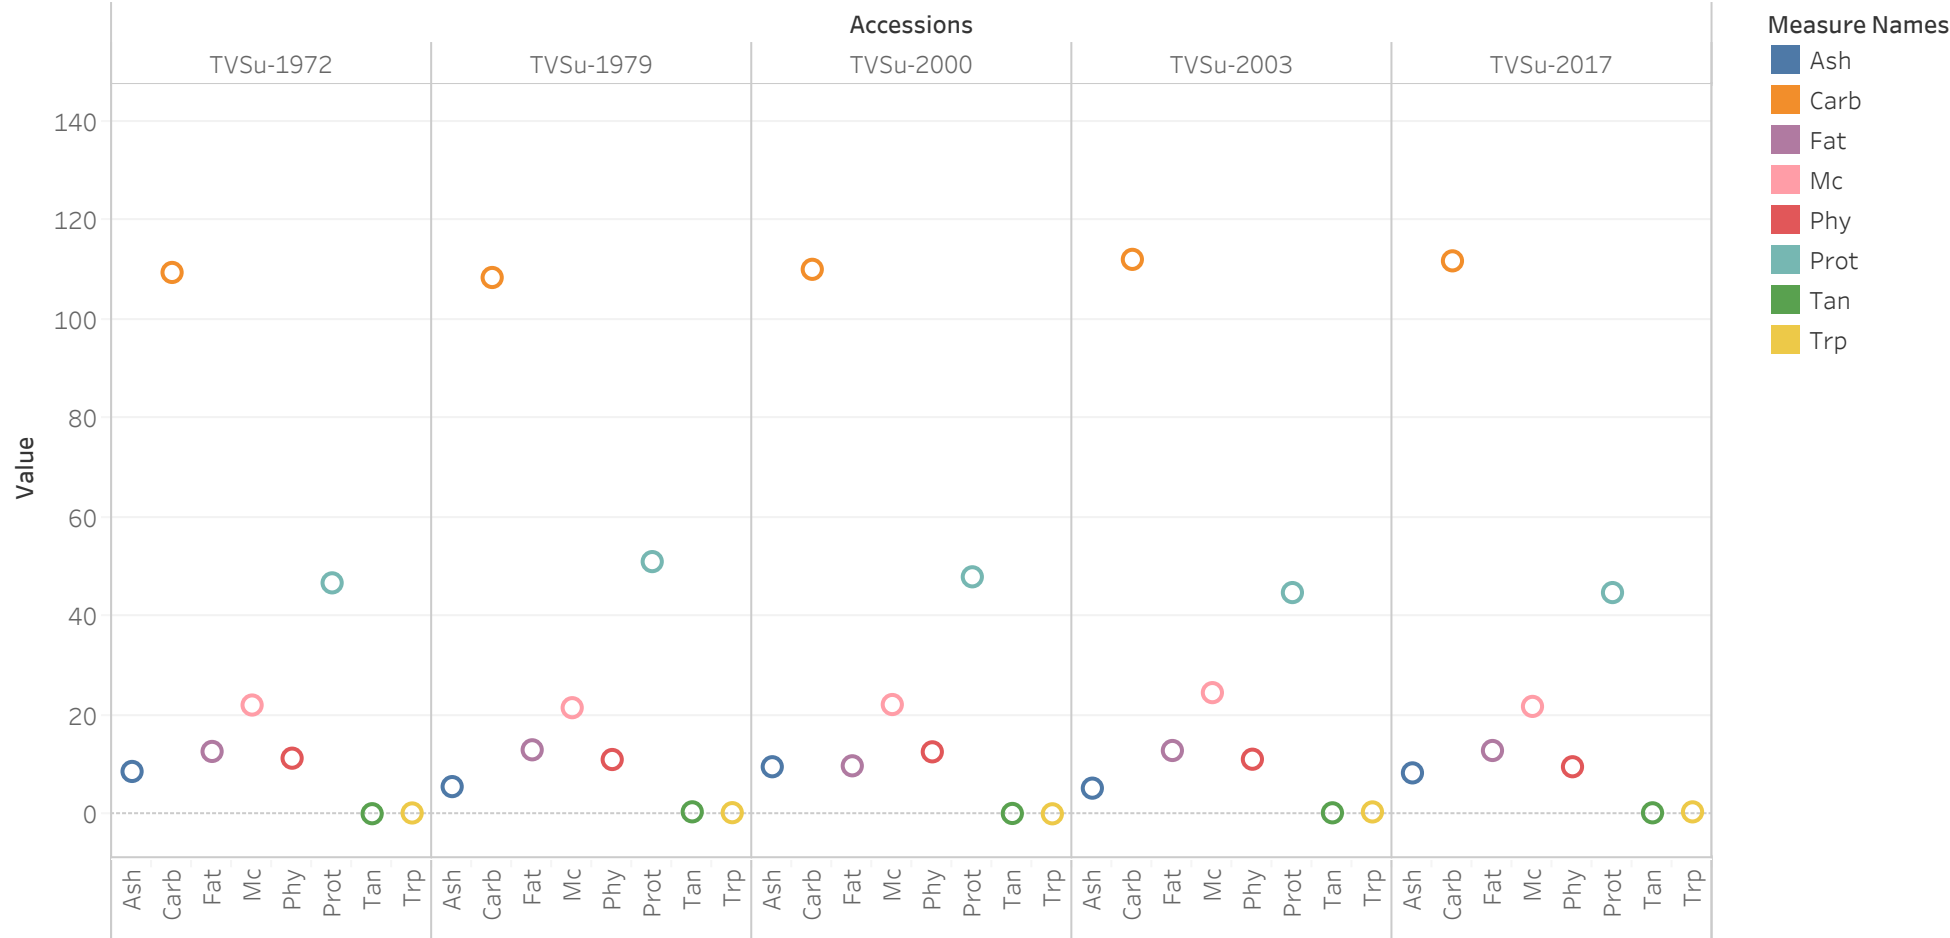

Ash, Carb, Fat, Mc, Phy, Prot, Tan and Trp for each Accessions. Color shows details about Ash, Carb, Fat, Mc, Phy, Prot, Tan and Trp.

Sheet 1

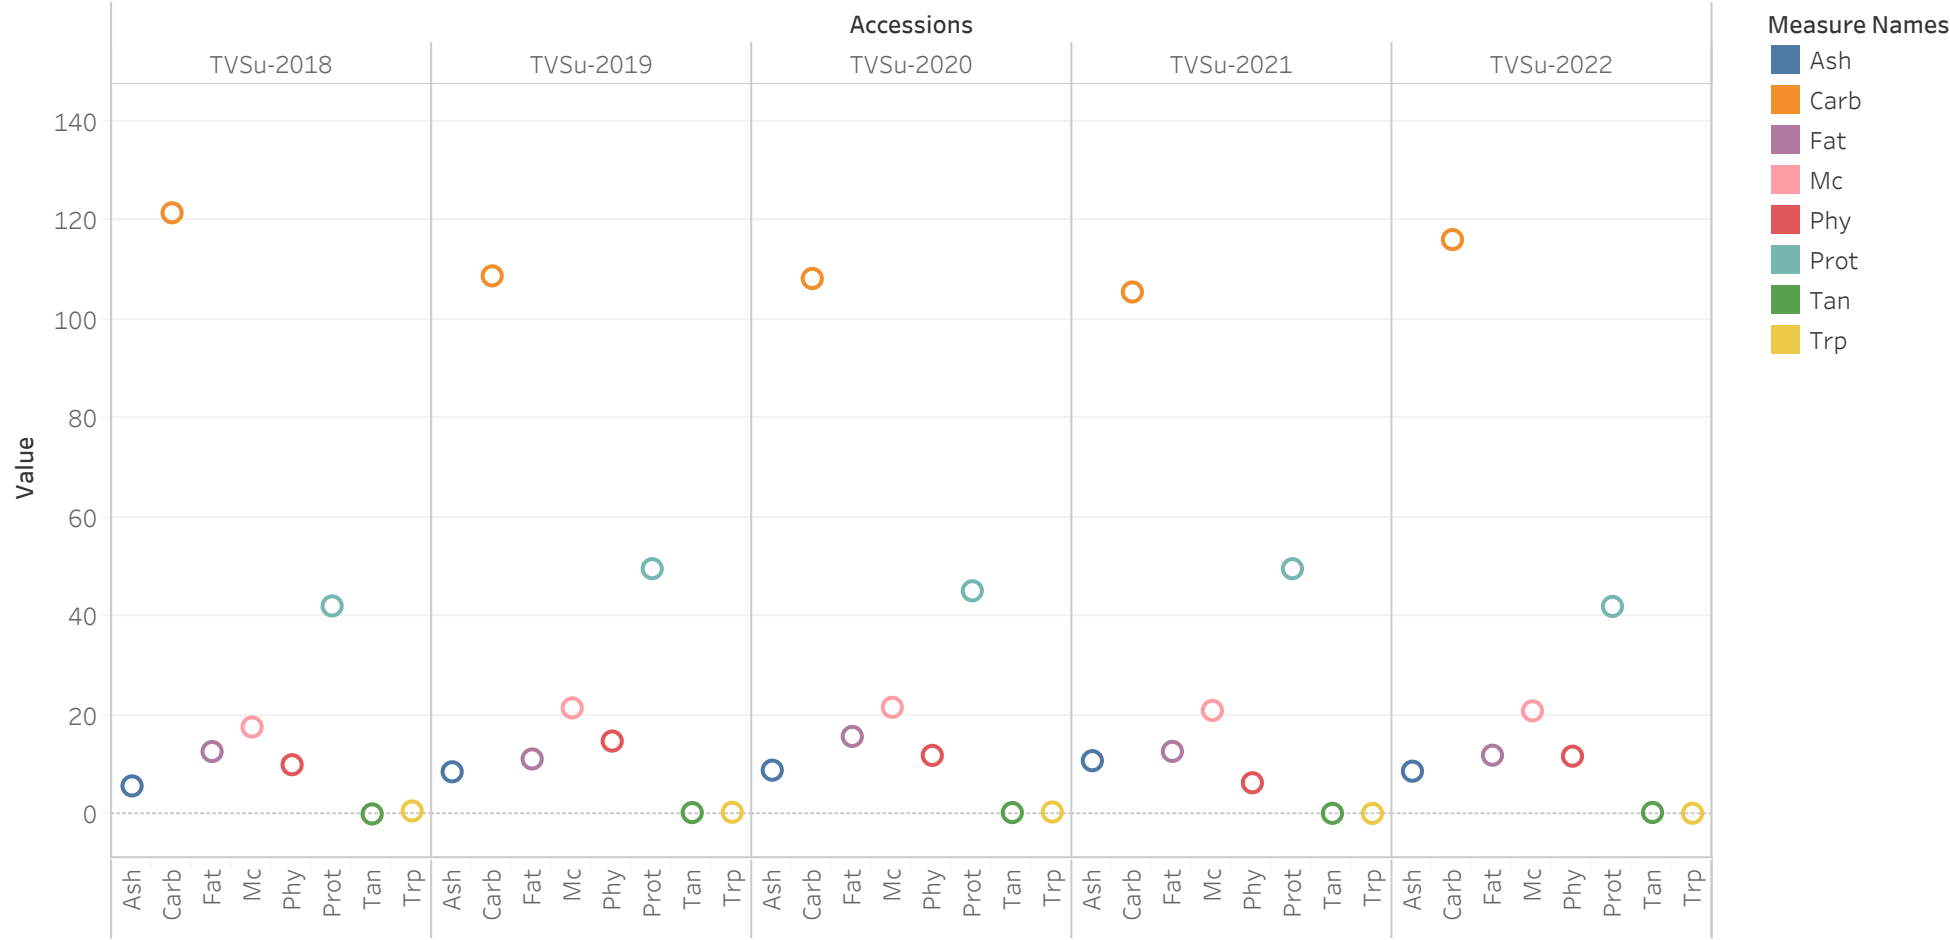

Ash, Carb, Fat, Mc, Phy, Prot, Tan and Trp for each Accessions. Color shows details about Ash, Carb, Fat, Mc, Phy, Prot, Tan and Trp.

Sheet 1

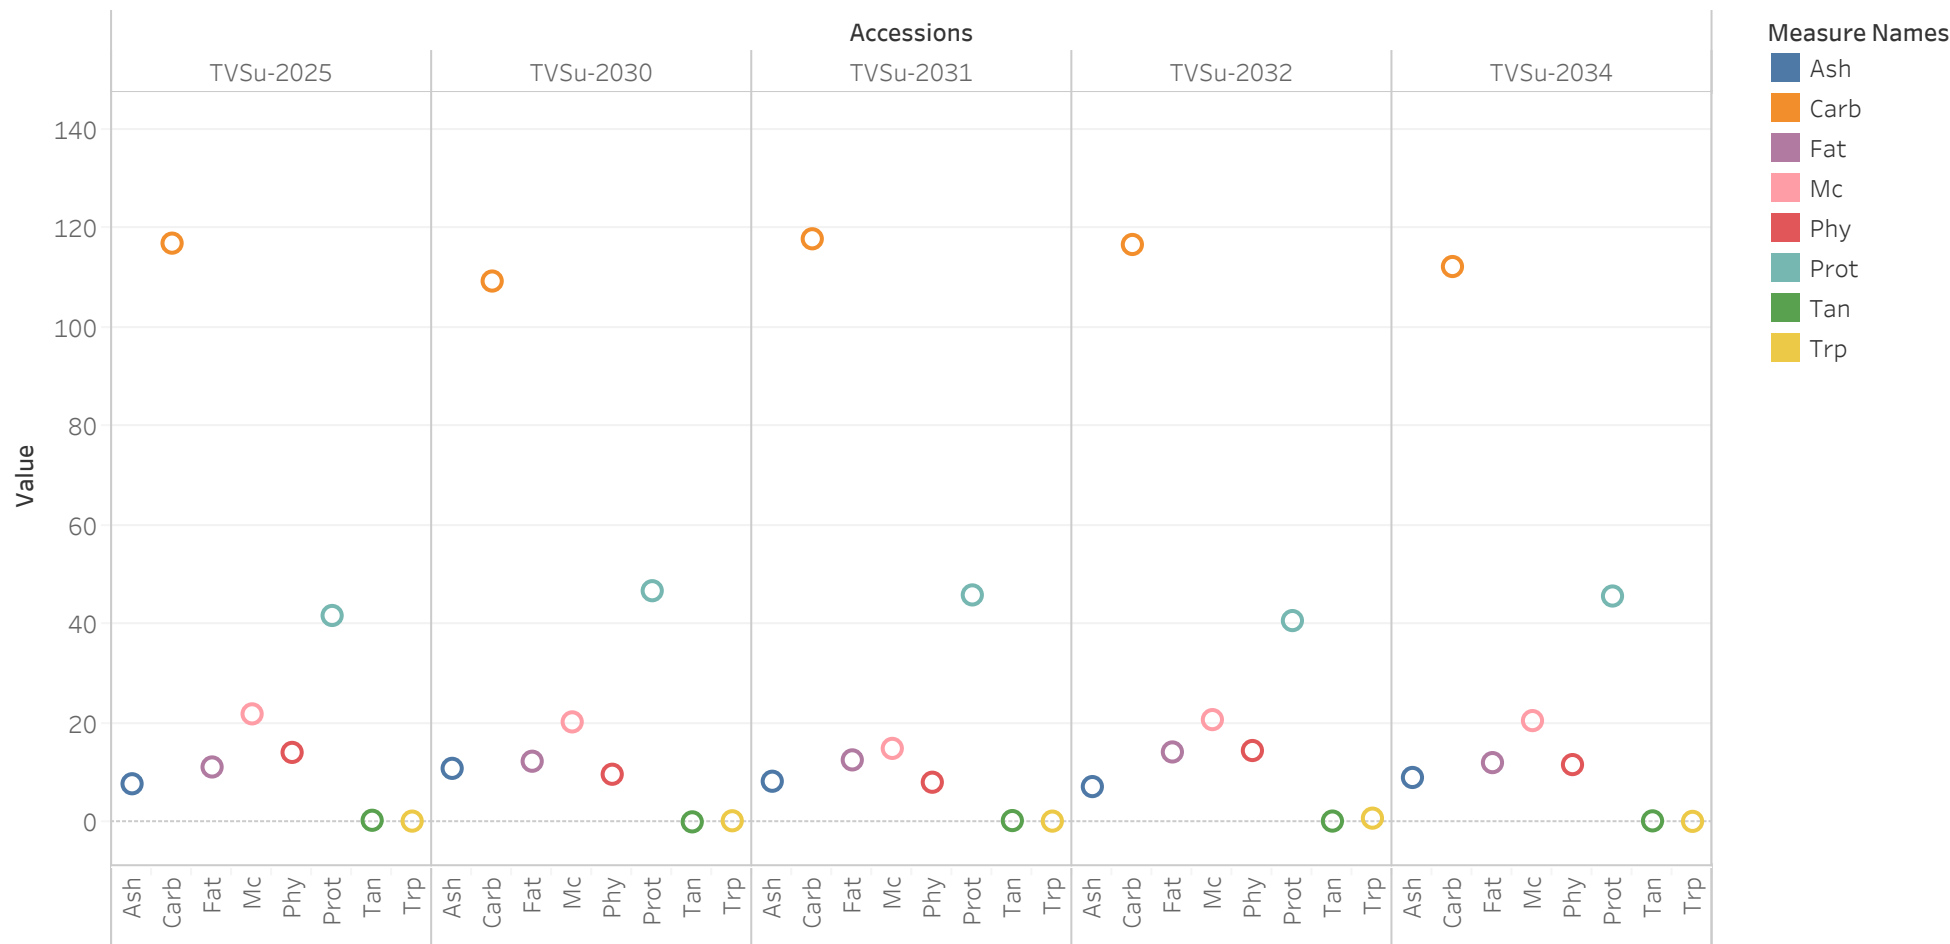

Ash, Carb, Fat, Mc, Phy, Prot, Tan and Trp for each Accessions. Color shows details about Ash, Carb, Fat, Mc, Phy, Prot, Tan and Trp.

Sheet 1

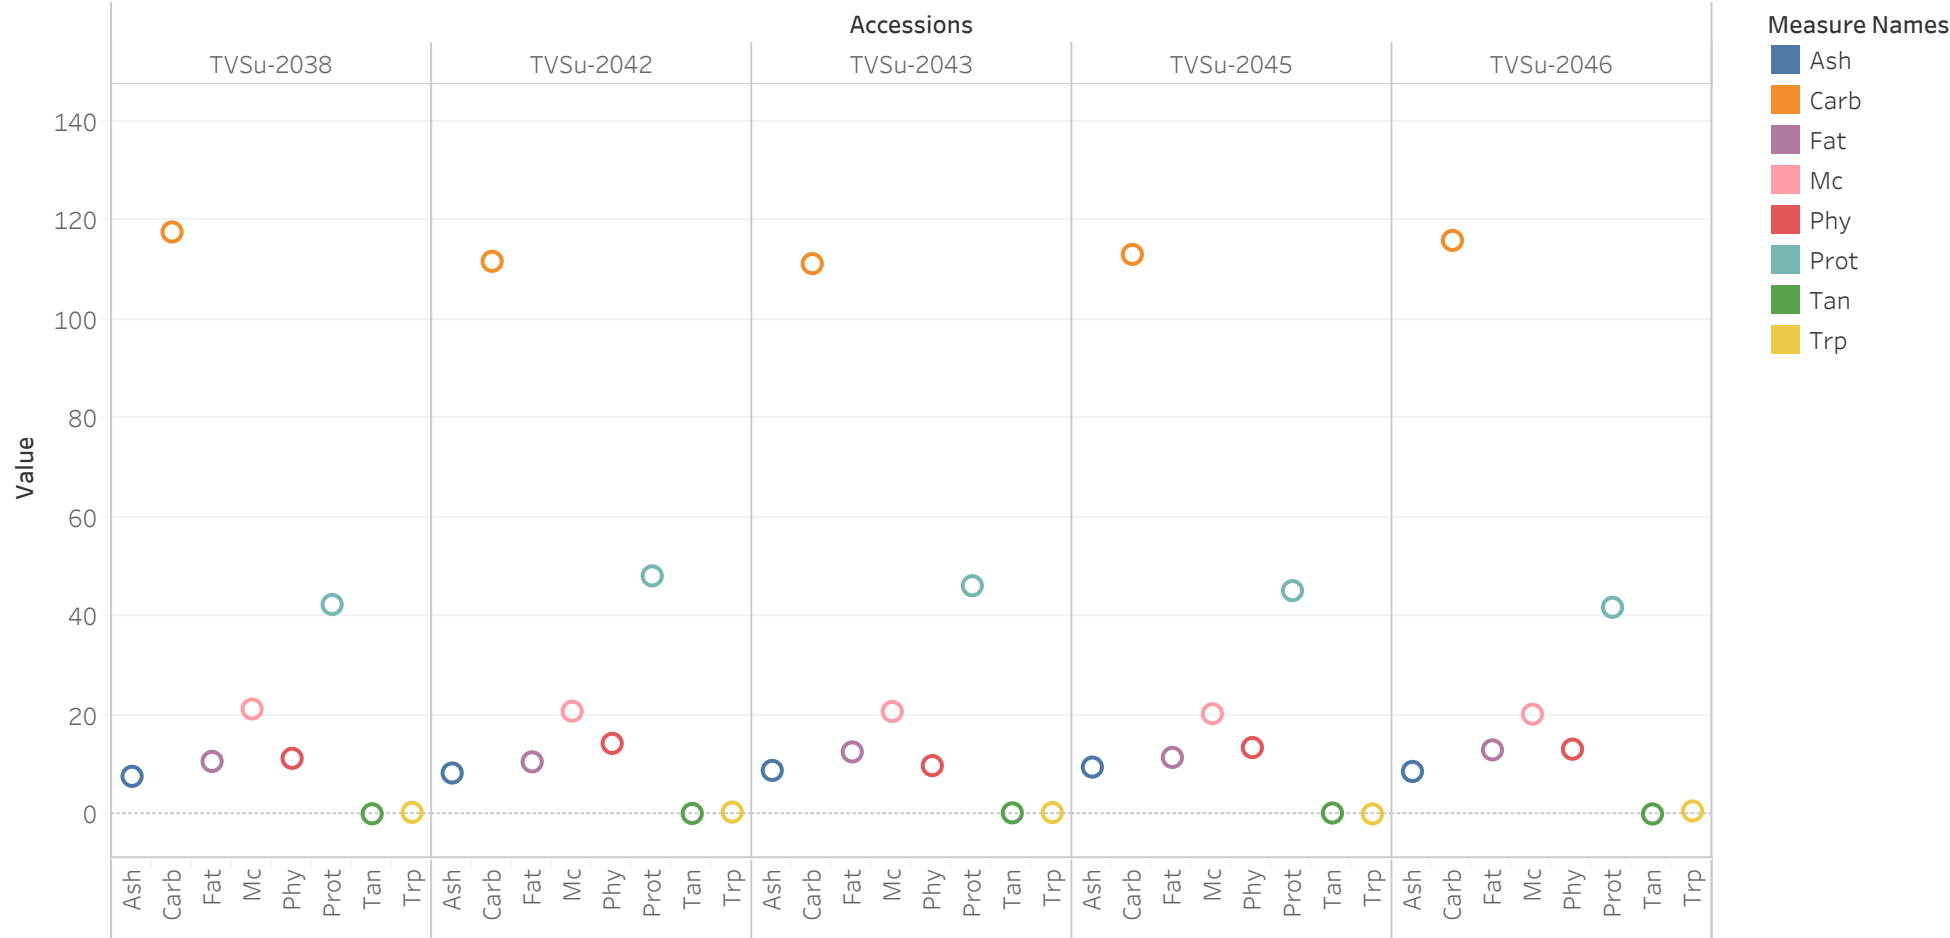

Ash, Carb, Fat, Mc, Phy, Prot, Tan and Trp for each Accessions. Color shows details about Ash, Carb, Fat, Mc, Phy, Prot, Tan and Trp.

Sheet 1

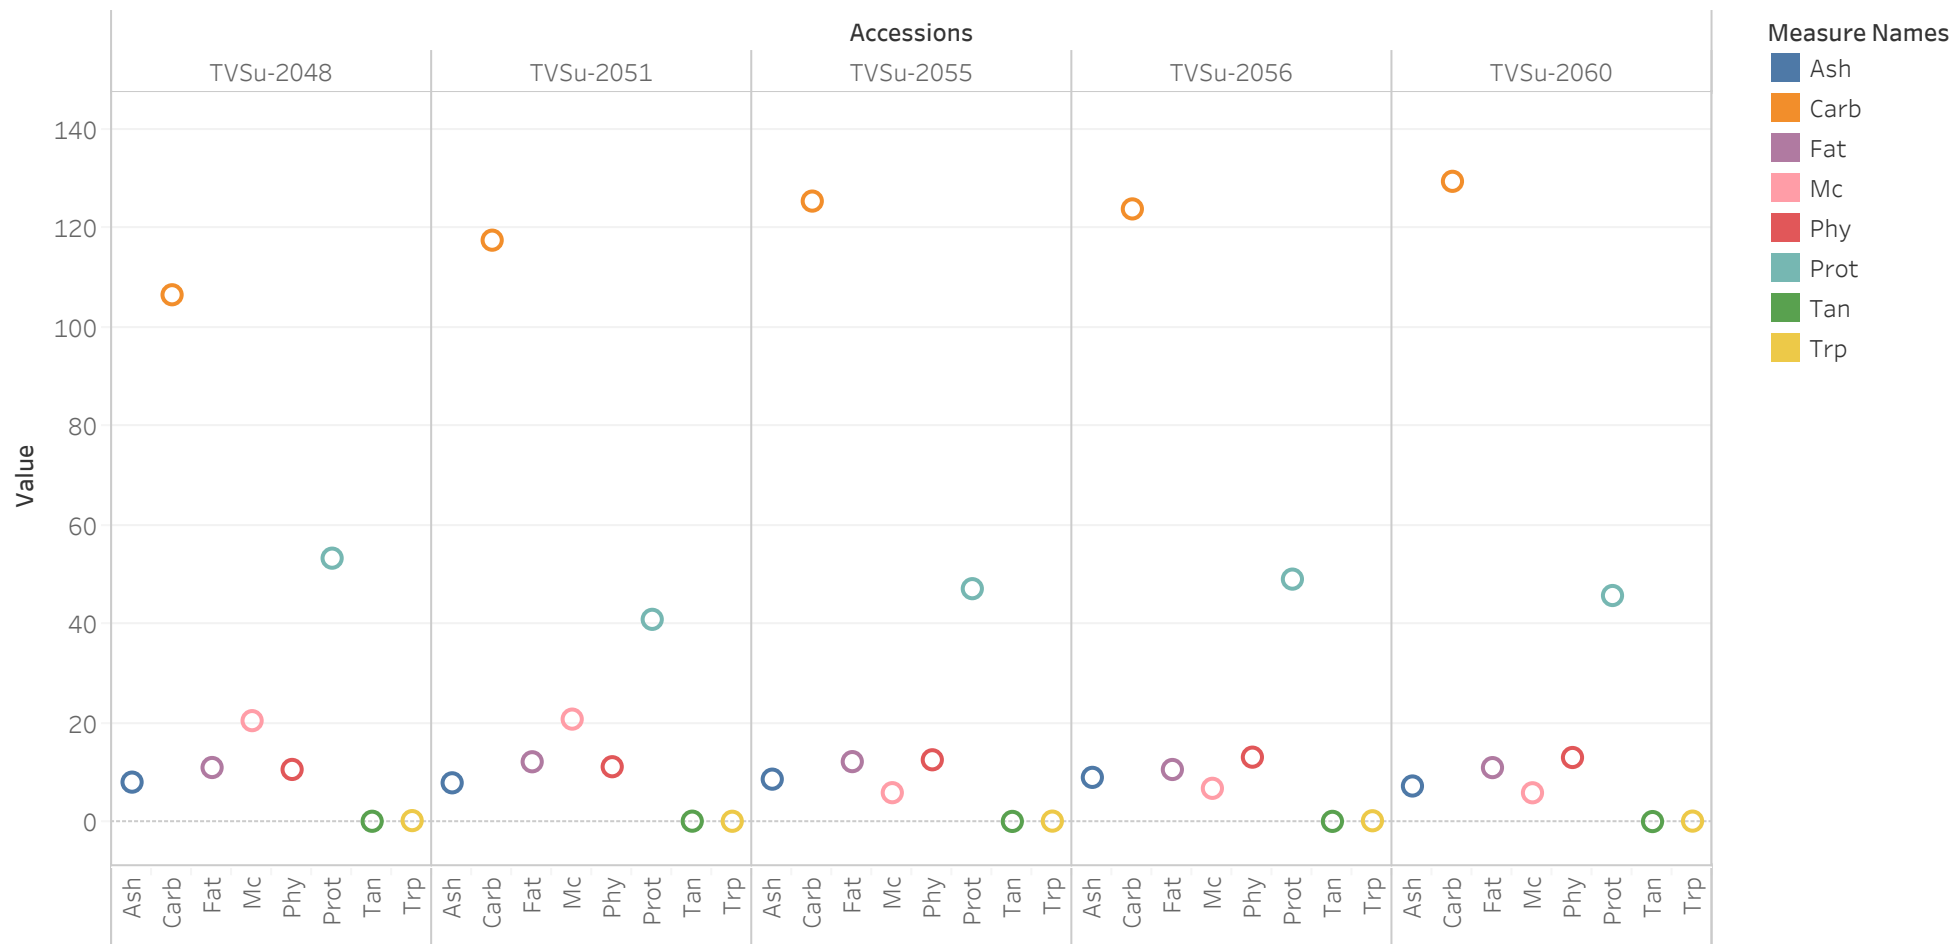

Ash, Carb, Fat, Mc, Phy, Prot, Tan and Trp for each Accessions. Color shows details about Ash, Carb, Fat, Mc, Phy, Prot, Tan and Trp.

Sheet 1

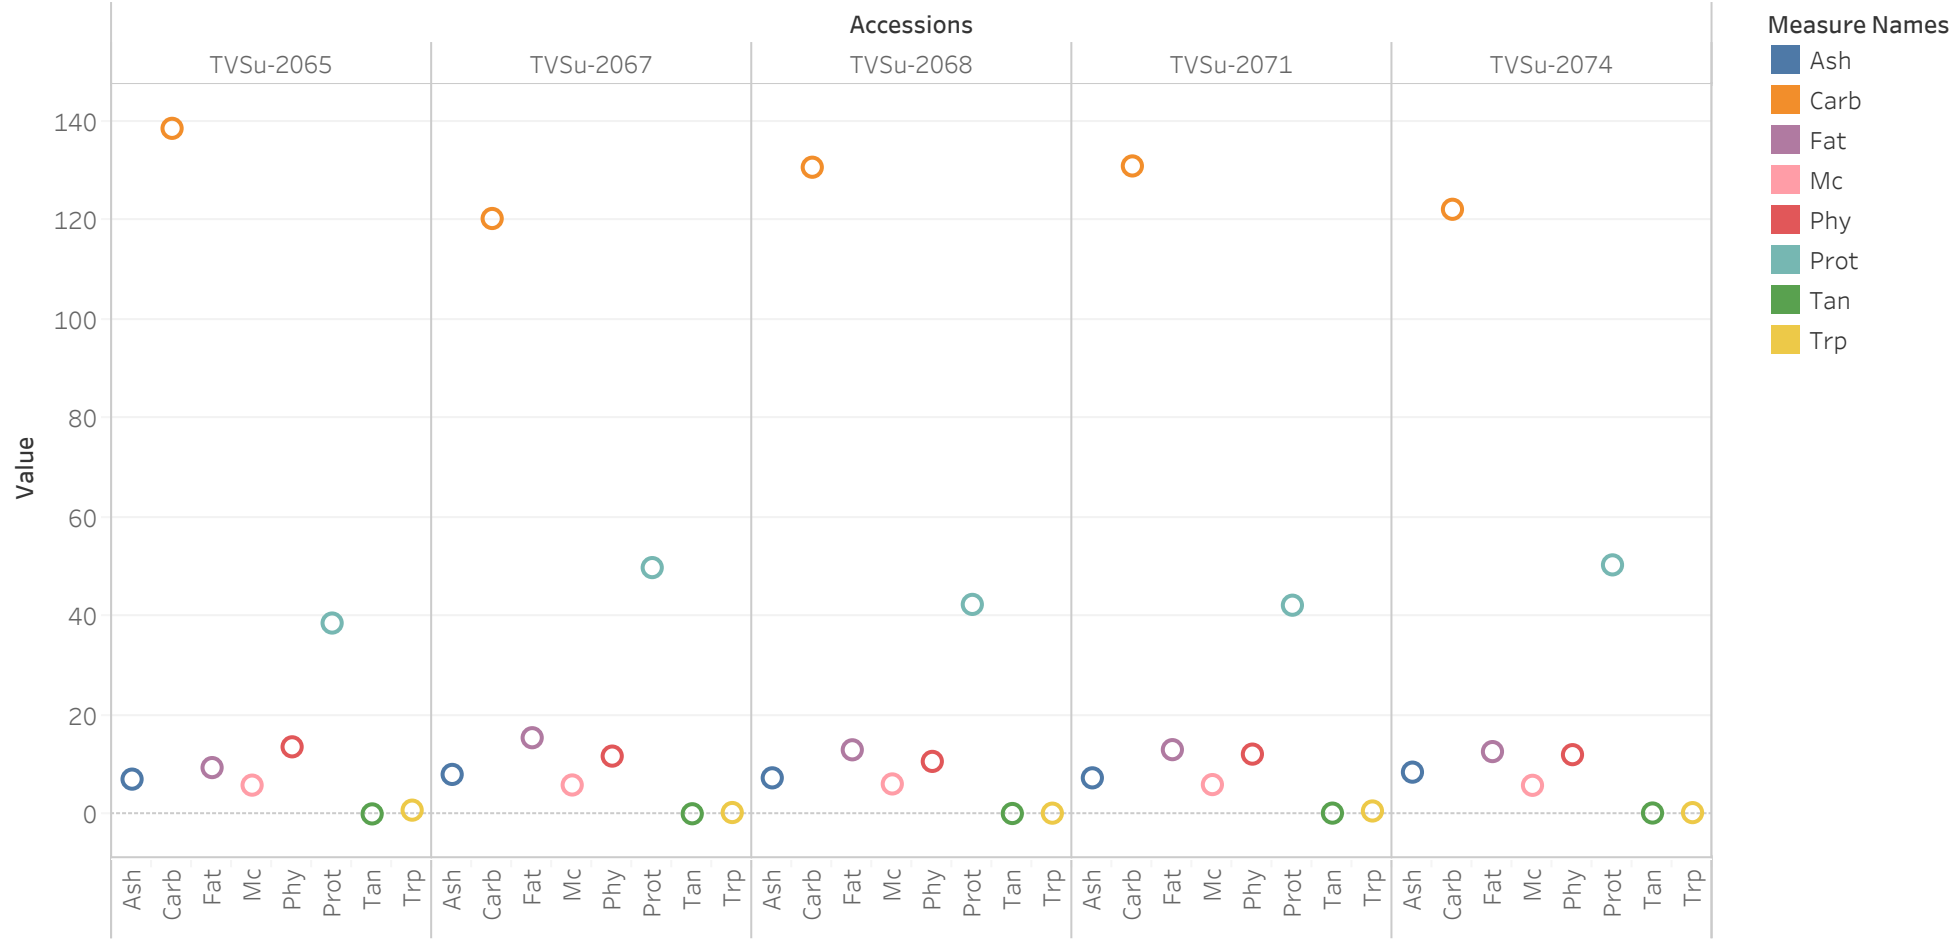

Ash, Carb, Fat, Mc, Phy, Prot, Tan and Trp for each Accessions. Color shows details about Ash, Carb, Fat, Mc, Phy, Prot, Tan and Trp.

Sheet 1

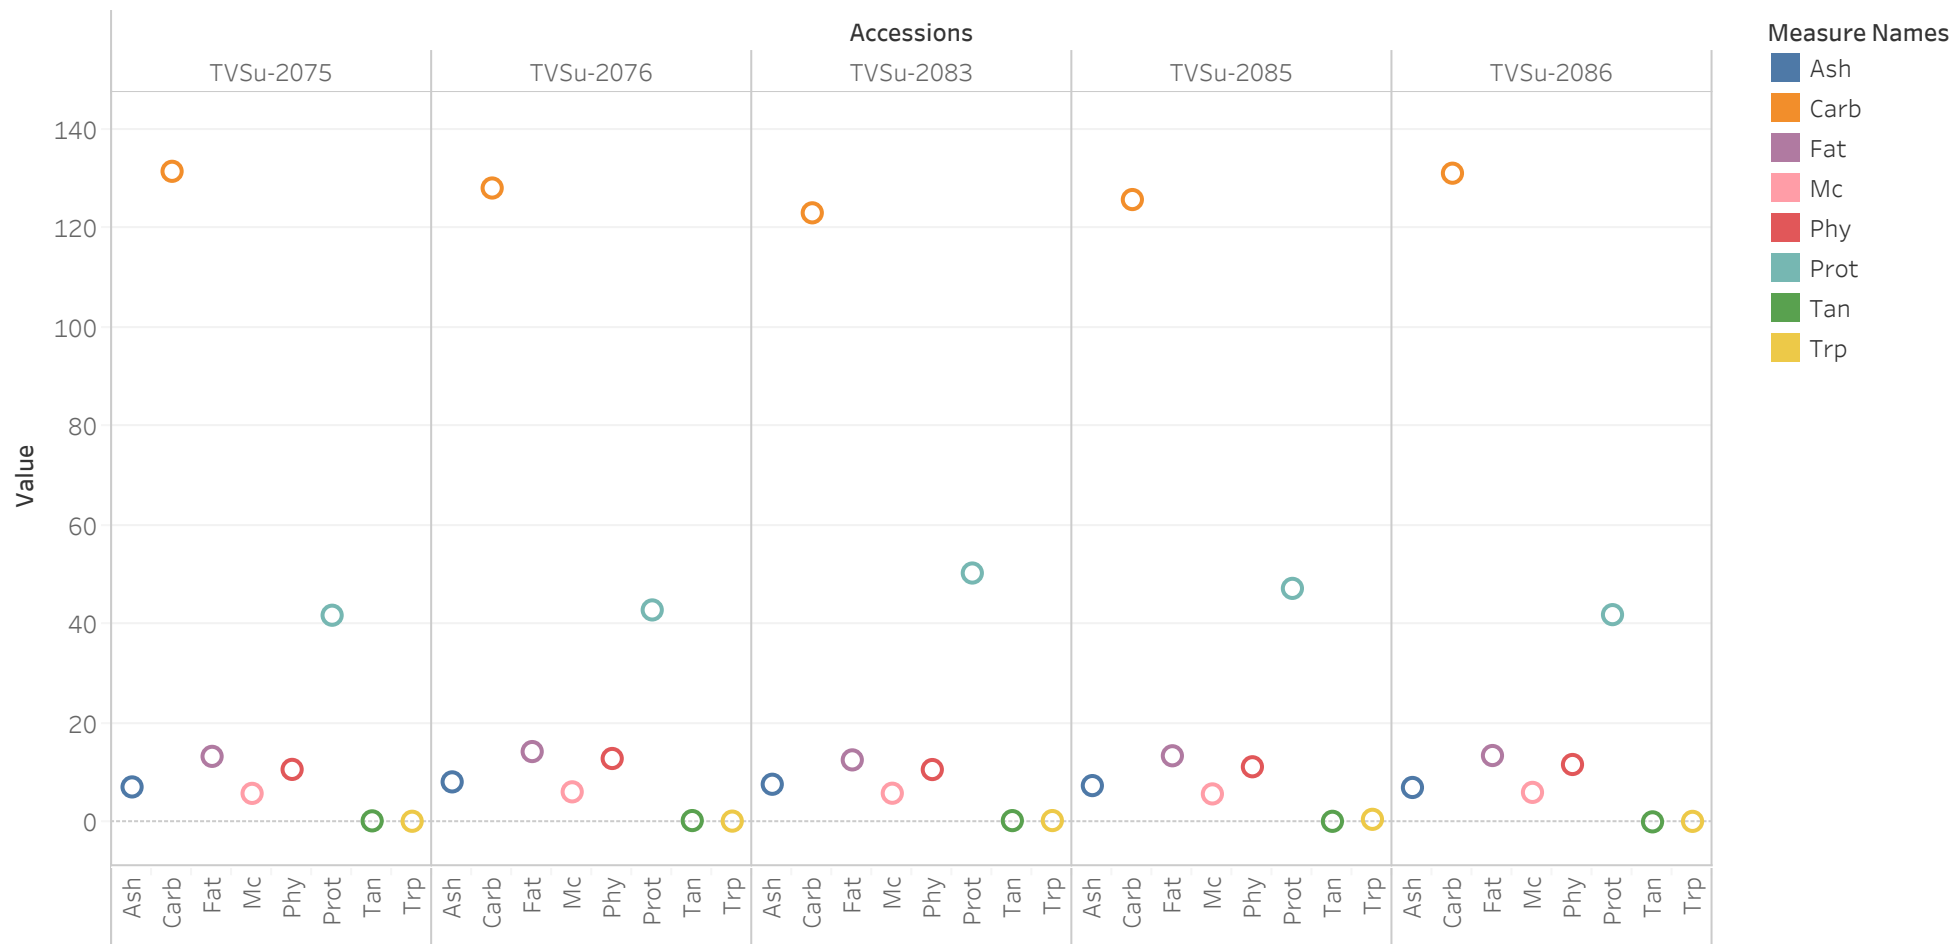

Ash, Carb, Fat, Mc, Phy, Prot, Tan and Trp for each Accessions. Color shows details about Ash, Carb, Fat, Mc, Phy, Prot, Tan and Trp.
