# Supplementary material for: Variations of Nutrient and Antinutrient Components of Bambara Groundnut (Vigna subterranea (L.) Verdc.) Seeds
Source: Hindawi journal article supplement (doi:10.1155/2022/2772362), 2022-10-21
Supplement: f1 [file 2772362.f1.zip › Table S1.pdf]

Table S1: Contribution of the traits to each PCA component

|            | Dim.1 | Dim.2 | Dim.3 | Dim.4 | Dim.5 | Dim.6 | Dim.7 | Dim.8 |
|------------|-------|-------|-------|-------|-------|-------|-------|-------|
| CHO        | 40.97 | 0.18  | 0.4   | 0.78  | 0.31  | 0.24  | 1.09  | 56.04 |
| Ash        | 10.51 | 21.33 | 1.65  | 0.22  | 2.96  | 20.63 | 40.05 | 2.64  |
| Fat        | 9.67  | 3.99  | 5.09  | 50.47 | 22.17 | 3.77  | 0.17  | 4.67  |
| MC         | 18.58 | 16.91 | 2.3   | 8.4   | 0.13  | 16.22 | 15.4  | 22.08 |
| Phytate    | 2.57  | 3.34  | 40.95 | 6.65  | 32.49 | 11.57 | 2.42  | 0     |
| Protein    | 16.87 | 11.56 | 0.01  | 3.94  | 7.55  | 45.49 | 0.02  | 14.57 |
| Tannin     | 0.66  | 42.66 | 0.91  | 0.64  | 13.18 | 1.53  | 40.43 | 0     |
| Tryptophar | 0.18  | 0.03  | 48.7  | 28.91 | 21.21 | 0.57  | 0.41  | 0     |
